# Supplementary material for: A comparison of structure, bonding and non-covalent interactions of aryl halide and diarylhalonium halogen-bond donors
Source: publisher site journal article supplement (doi:10.3762/bjoc.20.125), 2024-06-27
Supplement: Additional file 1 [file 1860-5397-20-125-S1.pdf]

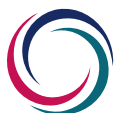

## Supporting Information

for

### **A comparison of structure, bonding and non-covalent interactions of aryl halide and diarylhalonium halogen-bond donors**

Nicole Javalý, Theresa M. McCormick and David R. Stuart

*Beilstein J. Org. Chem.* **2024**, *20*, 1428–1435. [doi:10.3762/bjoc.20.125](https://doi.org/10.3762/bjoc.20.125)

## Computational data

## Table of contents

|                                                                                           |     |
|-------------------------------------------------------------------------------------------|-----|
| Computational methods.....                                                                | S2  |
| Compounds included.....                                                                   | S3  |
| Table S1: Compound numbers and structures, with associated halogens .....                 | S3  |
| Structural data .....                                                                     | S5  |
| Table S2: Structural and energetic data for diarylhalonium compounds.....                 | S5  |
| Table S3: Structural and energetic data for aryl halides.....                             | S6  |
| Charge calculations .....                                                                 | S7  |
| Table S4: Natural population, Hirshfeld, and $V_s^+$ calculations for all compounds ..... | S7  |
| NBO data.....                                                                             | S10 |
| Table S5: Orbital contributions to bonds from hypervalent halogen centers .....           | S10 |
| Table S6: Orbital contributions from X–Cl compounds .....                                 | S10 |
| Table S7: Orbital contributions to bonds from monovalent halogen centers .....            | S11 |
| QTAIM calculations.....                                                                   | S12 |
| Table S8: Topology-based values at the X–Cl bond critical point (BCP). .....              | S12 |
| References .....                                                                          | S13 |

## Computational methods

All compounds were optimized at the M062x/6-311+G(d) level of theory with Def2-tzvpp used for Iodine and Astatine. Solvation in tetrahydrofuran ( $\epsilon=7.4257$ ) was included using the SMD solvation model with the altered van der waals radii for bromine and iodine defined by Huber *et al*[1].

M062x has been repeatedly shown to give good results for halogen bonding and hypervalent halogen compounds[2-6]. The combination of 6-311+G(d) and def2tzvpp was chosen to give a balance between accuracy for halogen bonding and computational efficiency[3, 7, 8].

Optimized structures were confirmed to contain no negative vibrational frequencies. All optimizations and frequency calculations were conducted using Gaussian09 with Gaussview6 for visualization[9].

Sigma hole potentials and Hirshfeld charges were calculated using Multiwfn, with the associated implementation of marching tetrahedra algorithm of Lu and Chen [10, 11] using the methodology described by Ravichandran *et al* [12]. Natural population analysis based charges and orbital contributions to bonds were calculated using NBO7.0[13, 14].

---

## Compounds included

Table S1: Compound numbers and structures, with associated halogens

|                                                                                     | Compound Code | halogen | name            |
|-------------------------------------------------------------------------------------|---------------|---------|-----------------|
| 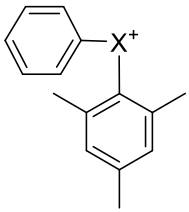   | 1             | Cl      | Ph(Mes)Cl+      |
|                                                                                     | 2             | Br      | Ph(Mes)Br+      |
|                                                                                     | 3             | I       | Ph(Mes)I+       |
|                                                                                     | 4             | At      | Ph(Mes)At+      |
|    | 5             | Cl      | 5FPh(Mes)Cl+    |
|                                                                                     | 6             | Br      | 5FPh(Mes)Br+    |
|                                                                                     | 7             | I       | 5FPh(Mes)I+     |
|                                                                                     | 8             | At      | 5FPh(Mes)At+    |
|   | 9             | Cl      | Ph(Mes)Cl+Cl-   |
|                                                                                     | 10            | Br      | Ph(Mes)Br+Cl-   |
|                                                                                     | 11            | I       | Ph(Mes)I+Cl-    |
|                                                                                     | 12            | At      | Ph(Mes)At+Cl-   |
|  | 13            | Cl      | 5FPh(Mes)Cl+Cl- |
|                                                                                     | 14            | Br      | 5FPh(Mes)Br+Cl- |
|                                                                                     | 15            | I       | 5FPh(Mes)I+Cl-  |
|                                                                                     | 16            | At      | 5FPh(Mes)At+Cl- |
|  | 17            | Cl      | Mes(Ph)Cl+Cl-   |
|                                                                                     | 18            | Br      | Mes(Ph)Br+Cl-   |
|                                                                                     | 19            | I       | Mes(Ph)I+Cl-    |
|                                                                                     | 20            | At      | Mes(Ph)At+Cl-   |
|  | 21            | Cl      | Mes(5Fph)Cl+Cl- |
|                                                                                     | 22            | Br      | Mes(5FPh)Br+Cl- |
|                                                                                     | 23            | I       | Mes(5FPh)I+Cl-  |
|                                                                                     | 24            | At      | Mes(5FPh)At+Cl- |

|                                                                                     | Compound # | Halogen | Name             |
|-------------------------------------------------------------------------------------|------------|---------|------------------|
| 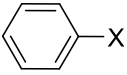   | 25         | Cl      | PhCl             |
|                                                                                     | 26         | Br      | PhBr             |
|                                                                                     | 27         | I       | PhI              |
|                                                                                     | 28         | At      | PhAt             |
|    | 29         | Cl      | MesCl            |
|                                                                                     | 30         | Br      | MesBr            |
|                                                                                     | 31         | I       | MesI             |
|                                                                                     | 32         | At      | MesAt            |
|    | 33         | Cl      | 5fph-cl          |
|                                                                                     | 34         | Br      | 5fph-br          |
|                                                                                     | 35         | I       | 5fph-i           |
|                                                                                     | 36         | At      | 5fph-at          |
|    | 37         | Cl      | Cl-imidazole     |
|                                                                                     | 38         | Br      | Br-imidazole     |
|                                                                                     | 39         | I       | I-imidazole      |
|                                                                                     | 40         | At      | At-imidazole     |
|   | 41         | Cl      | PhCl-Cl          |
|                                                                                     | 42         | Br      | PhBr-Cl          |
|                                                                                     | 43         | I       | PhI-Cl           |
|                                                                                     | 44         | At      | PhAt-Cl          |
|  | 45         | Cl      | MesCl-Cl         |
|                                                                                     | 46         | Br      | MesBr-Cl         |
|                                                                                     | 47         | I       | MesI-Cl          |
|                                                                                     | 48         | At      | MesAt-Cl         |
|  | 49         | Cl      | 5fphcl-cl        |
|                                                                                     | 50         | Br      | 5fphbr-cl        |
|                                                                                     | 51         | I       | 5fphi-cl         |
|                                                                                     | 52         | At      | 5fphat-cl        |
|  | 53         | Cl      | Cl-imidazole -Cl |
|                                                                                     | 54         | Br      | Br-imidazole -Cl |
|                                                                                     | 55         | I       | I-imidazole -Cl  |
|                                                                                     | 56         | At      | At-imidazole -Cl |
| X-Cl                                                                                | 57         | Cl      | Cl2              |
|                                                                                     | 58         | Br      | BrCl             |
|                                                                                     | 59         | I       | ICl              |
|                                                                                     | 60         | At      | AtCl             |

## Structural data

**Table S2: Structural and energetic data for diarylhalonium compounds.** All distances are reported in Ångstroms, angles in degrees, and energies in kcal/mol. Electronic energy with thermal free energy correction is reported as EE+TFE. Abbreviations are as follows: halogen is given as X, ipso carbon on phenyl rings as C(Ph), ipso carbon on mesityl ring as C(Mes), and chloride anion as Cl.

| Molecule |         | Energy (kcal/mol) | Structure (Å, °)               |                                 |               |                  |                   |             |
|----------|---------|-------------------|--------------------------------|---------------------------------|---------------|------------------|-------------------|-------------|
| Code     | halogen | Association ΔG    | Halogen-Phenyl Carbon distance | Halogen-Mesityl carbon distance | X-Cl distance | C(Ph)-X-Cl angle | C(Mes)-X-Cl angle | C-X-C angle |
| 19       | I       | -14.6592          | 2.11065                        | 2.11759                         | 3.00873       | 84.99325         | 178.1896          | 93.19639    |
| 11       | I       | -16.031           | 2.12269                        | 2.10314                         | 2.95431       | 175.3882         | 82.12929          | 93.27887    |
| 18       | Br      | -8.00199          | 1.95076                        | 1.94284                         | 3.07707       | 87.1195          | 174.6581          | 98.21514    |
| 10       | Br      | -8.14695          | 1.94731                        | 1.94233                         | 3.04411       | 177.6389         | 82.51125          | 98.27851    |
| 17       | Cl      | -5.90862          | 1.80985                        | 1.79736                         | 3.10504       | 88.01765         | 169.3155          | 102.598     |
| 9        | Cl      | -6.71811          | 1.8034                         | 1.80234                         | 3.0653        | 173.1908         | 83.32032          | 102.6054    |
| 20       | At      | -13.4996          | 2.19931                        | 2.21885                         | 3.00027       | 86.40401         | 178.1705          | 91.77632    |
| 12       | At      | -13.745           | 2.21966                        | 2.19531                         | 2.9697        | 175.7699         | 84.06511          | 91.82732    |
| 13       | Cl      | -9.47413          | 1.7649                         | 1.83011                         | 2.93915       | 169.6177         | 84.60099          | 102.0512    |
| 14       | Br      | -13.1476          | 1.93023                        | 1.96058                         | 2.83957       | 174.8097         | 85.38072          | 96.57637    |
| 15       | I       | -16.8769          | 2.15723                        | 2.11083                         | 2.69563       | 175.056          | 85.49545          | 90.33305    |
| 16       | At      | -23.1099          | 2.25606                        | 2.20061                         | 2.76898       | 175.9262         | 86.46664          | 89.82329    |
| 21       | Cl      | -10.0816          | 1.7504                         | 1.8194                          | 3.05773       | 76.97296         | 170.41            | 103.7151    |
| 22       | Br      | -10.4242          | 1.89196                        | 1.95639                         | 3.02762       | 77.94349         | 174.3047          | 99.00253    |
| 23       | I       | -12.9072          | 2.06975                        | 2.13049                         | 2.86311       | 79.80682         | 172.8553          | 93.22367    |
| 24       | At      | -16.4778          | 2.16091                        | 2.22518                         | 2.95731       | 80.06043         | 172.9478          | 93.0209     |
| 5        | Cl      |                   | 1.75288                        | 1.83199                         |               |                  |                   | 105.8797    |
| 6        | Br      |                   | 1.89586                        | 1.96545                         |               |                  |                   | 101.4374    |
| 7        | I       |                   | 2.07159                        | 2.11398                         |               |                  |                   | 98.76357    |
| 8        | At      |                   | 2.16407                        | 2.20749                         |               |                  |                   | 96.35432    |
| 3        | I       |                   | 2.10706                        | 2.11079                         |               |                  |                   | 98.44635    |
| 2        | Br      |                   | 1.9521                         | 1.94365                         |               |                  |                   | 100.9746    |
| 1        | Cl      |                   | 1.80985                        | 1.80574                         |               |                  |                   | 104.8866    |
| 4        | At      |                   | 2.19614                        | 2.20157                         |               |                  |                   | 95.8945     |

**Table S3: Structural and energetic data for aryl halides.** All distances are reported in Ångstroms, angles in degrees, and energies in kcal/mol. Electronic energy with thermal free energy correction is reported as EE+TFE.

| Molecule |         | Energy (kcal/mol)      | Structure (Å, °)          |                            |              |
|----------|---------|------------------------|---------------------------|----------------------------|--------------|
| code     | halogen | Association $\Delta G$ | Halogen - Carbon distance | Halogen- Chloride distance | C-X-Cl angle |
| 25       | Cl      |                        | 1.75283                   |                            |              |
| 26       | Br      |                        | 1.90757                   |                            |              |
| 27       | I       |                        | 2.09647                   |                            |              |
| 28       | At      |                        | 2.18713                   |                            |              |
| 29       | Cl      |                        | 1.75807                   |                            |              |
| 30       | Br      |                        | 1.91601                   |                            |              |
| 31       | I       |                        | 2.1075                    |                            |              |
| 32       | At      |                        | 2.19993                   |                            |              |
| 33       | Cl      |                        | 1.71821                   |                            |              |
| 34       | Br      |                        | 1.87332                   |                            |              |
| 35       | I       |                        | 2.06831                   |                            |              |
| 36       | At      |                        | 2.16238                   |                            |              |
| 37       | Cl      |                        | 1.68822                   |                            |              |
| 38       | Br      |                        | 1.8446                    |                            |              |
| 39       | I       |                        | 2.04559                   |                            |              |
| 40       | At      |                        | 2.143                     |                            |              |
| 41       | Cl      | 6.08872                | 1.748                     | 3.84731                    | 174.8494     |
| 42       | Br      | 6.526094               | 1.90585                   | 3.44397                    | 179.9923     |
| 43       | I       | 3.264929               | 2.10344                   | 3.32225                    | 177.1983     |
| 44       | At      | 0.963854               | 2.20263                   | 3.24867                    | 177.9025     |
| 45       | Cl      | 6.299563               | 1.75356                   | 3.70862                    | 175.6576     |
| 46       | Br      | 7.143562               | 1.91284                   | 3.51423                    | 179.9484     |
| 47       | I       | 4.462844               | 2.11216                   | 3.37545                    | 177.0793     |
| 48       | At      | 2.075172               | 2.21331                   | 3.28858                    | 177.8118     |
| 49       | Cl      | 4.486689               | 1.71954                   | 3.29347                    | 175.971      |
| 50       | Br      | 1635.519               | 1.87031                   | 3.18421                    | 179.8712     |
| 51       | I       | 0.111697               | 2.10508                   | 3.05746                    | 178.1154     |
| 52       | At      | -5.02948               | 2.21955                   | 2.99999                    | 179.6705     |
| 53       | Cl      | -3.69352               | 1.69016                   | 3.10458                    | 176.4315     |
| 54       | Br      | -4.70632               | 1.85728                   | 3.08581                    | 179.9841     |
| 55       | I       | -7.26091               | 2.10126                   | 2.89723                    | 179.985      |
| 56       | At      | -14.2733               | 2.21914                   | 2.89444                    | 179.9606     |
| 57       | Cl      |                        |                           | 2.02167                    |              |
| 58       | Br      |                        |                           | 2.16046                    |              |
| 59       | I       |                        |                           | 2.33182                    |              |
| 60       | At      |                        |                           | 2.42567                    |              |

## Charge calculations

**Table S4: Natural population, Hirshfeld, and Vs+ calculations for all compounds.** Calculation methods for all values described above. Abbreviations are as follows: NPA is Natural Population Analysis Charge, pPh is for a sigma hole that is opposite a phenyl ring, pMes is for a sigma hole opposite a mesityl ring, X is for halogen, Mes and Ph refer to the ipso carbons on those rings, Cl- is for chloride anion, Cl#2 is for, in halogen dichloride molecules, the secondary chloride associated with the halogen.

| Molecule |          | Natural Population Analysis Charges |         |         |         |         | Sigma Hole Potentials (kcal/mol) |                 | Hirshfeld Charges |                 |                  |               |                 |
|----------|----------|-------------------------------------|---------|---------|---------|---------|----------------------------------|-----------------|-------------------|-----------------|------------------|---------------|-----------------|
| code     | name     | NPA X                               | NPA Mes | NPA Ph  | NPA Cl  | NPA Cl2 | pPh sigma hole kcal/             | pMes sigma hole | Hirshfeld X       | Hirshfeld Ph(X) | Hirshfeld Mes(X) | Hirshfeld Cl- | Hirshfeld Cl #2 |
| 25       | PhCl     | -0.018                              |         | -0.0502 |         |         | 1.85581                          |                 | -0.0847           | 0.01426         |                  |               |                 |
| 26       | PhBr     | 0.04755                             |         | -0.1159 |         |         | 7.47988                          |                 | -0.0668           | -0.0058         |                  |               |                 |
| 27       | PhI      | 0.14862                             |         | -0.1957 |         |         | 19.6049                          |                 | -0.0352           | -0.0213         |                  |               |                 |
| 28       | PhAt     | 0.13922                             |         | -0.1761 |         |         | 24.2192                          |                 | -0.0374           | -0.0243         |                  |               |                 |
| 57       | Cl2      | 0                                   |         |         | 0       |         | 25.2123                          |                 | 0                 |                 |                  | 0             |                 |
| 58       | BrCl     | 0.09909                             |         |         | -0.0991 |         | 36.5404                          |                 | 0.04373           |                 |                  | -0.0437       |                 |
| 59       | ICl      | 0.26277                             |         |         | -0.2628 |         | 53.6514                          |                 | 0.10422           |                 |                  | -0.1042       |                 |
| 60       | AtCl     | 0.3402                              |         |         | -0.3402 |         | 72.8097                          |                 | 0.16248           |                 |                  | -0.1625       |                 |
| 41       | PhCl-Cl  | 0.006                               |         | -0.0557 | -0.9975 |         |                                  |                 | -0.0922           | 0.01213         |                  |               | -0.9663         |
| 42       | PhBr-Cl  | 0.09449                             |         | -0.1321 | -0.9855 |         |                                  |                 | -0.0808           | -0.0145         |                  |               | -0.9255         |
| 43       | PhI-Cl   | 0.18382                             |         | -0.2233 | -0.9637 |         |                                  |                 | -0.102            | -0.0356         |                  |               | -0.867          |
| 44       | PhAt-Cl  | 0.19885                             |         | -0.2246 | -0.9488 |         |                                  |                 | -0.1092           | -0.0484         |                  |               | -0.8281         |
| 45       | MesCl-Cl | -0.0163                             |         | 0.04862 | -0.9963 |         |                                  |                 | -0.071            |                 | -0.0006          |               | -0.9603         |
| 46       | MesBr-Cl | 0.08237                             |         | -0.119  | -0.9883 |         |                                  |                 | -0.052            |                 | -0.0249          |               | -0.9324         |
| 47       | MesI-Cl  | 0.16862                             |         | -0.2254 | -0.9688 |         |                                  |                 | -0.0739           |                 | -0.0457          |               | -0.8776         |
| 48       | MesAt-Cl | 0.17612                             |         | -0.1449 | -0.9542 |         |                                  |                 | -0.0837           |                 | -0.0575          |               | -0.8389         |
| 29       | MesCl    | -0.0417                             |         | 0.04732 |         |         |                                  | -0.1435         | -0.0646           |                 | 0.00214          |               |                 |
| 30       | MesBr    | 0.03458                             |         | -0.1198 |         |         |                                  | 5.0016          | -0.0451           |                 | -0.0172          |               |                 |



|    |                 |         |         |         |         |                 |         |         |                 |
|----|-----------------|---------|---------|---------|---------|-----------------|---------|---------|-----------------|
| 31 | MesI            | 0.12973 |         | -0.197  |         | 16.061          | -0.0186 |         | -0.0331         |
| 32 | MesAt           | 0.11374 |         | -0.0985 |         | 20.592          | -0.0241 |         | -0.0354         |
| 19 | Mes(Ph)I+Cl-    | 1.06067 | -0.2153 | -0.2061 | -0.8974 |                 | 0.46288 | -0.0097 | -0.0435 -0.7124 |
| 11 | Ph(Mes)I+Cl-    | 1.06528 | -0.2148 | -0.2559 | -0.88   |                 | 0.45987 | -0.0311 | -0.0243 -0.6848 |
| 18 | Mes(Ph)Br+Cl-   | 0.74745 | -0.0857 | -0.9414 | -0.0936 |                 | 0.36629 | 0.01287 | -0.0195 -0.7937 |
| 10 | Ph(Mes)Br+Cl-   | 0.74842 | -0.0365 | -0.1345 | -0.9343 |                 | 0.3681  | -0.0047 | -0.0021 -0.7749 |
| 17 | Mes(Ph)Cl+Cl-   | 0.57155 | 0.00492 | -0.02   | -0.9672 |                 | 0.31183 | 0.03477 | 0.00998 -0.8374 |
| 9  | Ph(Mes)Cl+Cl-   | 0.57297 | 0.03954 | -0.0452 | -0.9617 |                 | 0.31373 | 0.02739 | 0.01893 -0.8147 |
| 20 | Mes(Ph)At+Cl-   | 1.07862 | -0.2694 | -0.184  | -0.8884 |                 | 0.46279 | -0.0101 | -0.0541 -0.683  |
| 12 | Ph(Mes)At+Cl-   | 1.07885 | -0.1897 | -0.2593 | -0.8793 |                 | 0.46199 | -0.0439 | -0.0247 -0.671  |
| 3  | Ph(Mes)I+       |         |         |         |         | 124.528 124.636 | 0.54643 | -0.0039 | -0.0217         |
| 2  | Ph(Mes)br+      | 0.68342 | -0.056  | -0.1011 |         | 105.476 109.075 | 0.38482 | 0.01172 | -0.0054         |
| 1  | Ph(Mes)cl+      | 0.53031 | 0.02265 | -0.0299 |         | 106.074 109.026 | 0.32785 | 0.03654 | 0.0175          |
| 4  | Ph(Mes)at+      | 0.98332 | -0.1364 | -0.1862 |         | 125.069 125.347 | 0.54017 | -0.0065 | -0.0222         |
| 33 | 5fph-cl         | 0.07596 |         | -0.1646 |         | 19.9627         | -0.008  | -0.0009 |                 |
| 34 | 5fph-br         | 0.15124 |         | -0.2419 |         | 26.0063         | 0.01808 | -0.0291 |                 |
| 35 | 5fph-i          | 0.27876 |         | -0.323  |         | 42.8151         | 0.07448 | -0.0468 |                 |
| 36 | 5fph-at         | 0.28128 |         | -0.3138 |         | 49.7674         | 0.08127 | -0.0541 |                 |
| 49 | 5fphcl-cl       | 0.10352 |         | -0.1702 | -0.9853 |                 | -0.0342 | -0.0064 | -0.9276         |
| 50 | 5fphbr-cl       | 0.19428 |         | -0.2841 | -0.9627 |                 | -0.0167 | -0.0382 | -0.8869         |
| 51 | 5fphi-cl        | 0.28651 |         | -0.3537 | -0.9137 |                 | -0.0394 | -0.072  | -0.787          |
| 52 | 5fphat-cl       | 0.30828 |         | -0.3603 | -0.8872 |                 | -0.0416 | -0.0879 | -0.7348         |
| 13 | 5FPh(Mes)Cl+Cl- | 0.62019 | -0.1865 | 0.05503 | -0.9332 |                 | 0.33602 | 0.0018  | 0.01783 -0.7703 |
| 14 | 5FPh(Mes)Br+Cl- | 0.79879 | -0.0798 | -0.2854 | -0.8587 |                 | 0.38669 | -0.0407 | -0.0046 -0.6823 |
| 15 | 5FPh(Mes)I+Cl-  | 1.10664 | -0.1644 | -0.4057 | -0.7441 |                 | 0.46884 | -0.0765 | -0.0294 -0.5259 |
| 16 | 5FPh(Mes)At+Cl- | 1.147   | -0.193  | -0.4153 | -0.7674 |                 | 0.4938  | -0.0918 | -0.0291 -0.5385 |
| 5  | 5FPh(Mes)Cl+    | 0.59101 | 0.03849 | -0.1795 |         | 121.987 123.099 | 0.36427 | 0.01127 | 0.01889         |
| 6  | 5FPh(Mes)Br+    | 0.75901 | -0.0417 | -0.2651 |         | 123.055 120.148 | 0.4312  | -0.0199 | -0.0047         |
| 7  | 5FPh(Mes)I+     | 1.11375 | -0.2134 | -0.3587 |         | 145.793 137.344 | 0.61239 | -0.037  | -0.0206         |
| 8  | 5FPh(Mes)At+    | 1.09898 | -0.1355 | -0.3458 |         | 149.278 135.854 | 0.61617 | -0.0437 | -0.0213         |

|    |                                       |         |         |         |         |         |         |         |         |         |
|----|---------------------------------------|---------|---------|---------|---------|---------|---------|---------|---------|---------|
| 21 | Mes(5Fph)Cl+Cl<br>-                   | 0.6318  | 0.01305 | -0.1513 | -0.9557 |         | 0.34583 | 0.00779 | 0.00813 | -0.8179 |
| 22 | Mes(5FPh)Br+Cl<br>-                   | 0.82557 | -0.0861 | -0.2375 | -0.9271 |         | 0.40976 | -0.0194 | -0.0235 | -0.779  |
| 23 | Mes(5FPh)I+Cl-<br>Mes(5FPh)At+C<br>I- | 1.16065 | -0.2736 | -0.3519 | -0.8466 |         | 0.50845 | -0.0447 | -0.0529 | -0.6583 |
| 24 |                                       | 1.19095 | -0.2305 | 0.37192 | -0.872  |         | 0.53356 | -0.0492 | -0.0595 | -0.6755 |
| 37 | Climidazole                           | 0.1337  |         | 0.41989 |         | 94.031  | 0.08323 | 0.14649 |         |         |
| 38 | Brimidazole                           | 0.21013 |         | 0.34225 |         | 97.2126 | 0.11626 | 0.11146 |         |         |
| 39 | limidazole                            | 0.34915 |         | 0.27117 |         | 113.55  | 0.19472 | 0.0948  |         |         |
| 40 | Atimidazole                           | 0.34751 |         | 0.27857 |         | 119.837 | 0.19936 | 0.08584 |         |         |
| 53 | Climidazole -Cl                       | 0.16057 |         | 0.41457 | -0.9746 |         | 0.04408 | 0.13899 |         | -0.9012 |
| 54 | Brimidazole -Cl                       | 0.24307 |         | 0.33013 | -0.9494 |         | 0.06386 | 0.09835 |         | -0.8562 |
| 55 | limidazole -Cl                        | 0.32157 |         | 0.24604 | -0.8659 |         | 0.03485 | 0.06762 |         | -0.7197 |
| 56 | Atimidazole -Cl                       | 0.34339 |         | 0.23203 | -0.8478 |         | 0.03674 | 0.04716 |         | -0.6795 |

## NBO data

Table S5: Orbital contributions to bonds from hypervalent halogen centers

Orbital contributions are given as percentages.

| Code | halogen | name            | X-Mes S | X-Mes P | X-Mes D | X-Mes F | X-Ph S | X-Ph P | X-Ph D | X-Ph F |
|------|---------|-----------------|---------|---------|---------|---------|--------|--------|--------|--------|
| 19   | I       | Mes(Ph)I+Cl-    | 8.12    | 91.4    | 0.42    |         | 11.3   | 88.4   | 0.43   |        |
| 11   | I       | Ph(Mes)I+Cl-    | 12      | 87.6    | 0.35    |         | 7.43   | 92     | 0.54   |        |
| 18   | Br      | Mes(Ph)Br+Cl-   | 12.4    | 87.1    | 0.47    |         | 14.5   | 85.1   | 0.45   |        |
| 10   | Br      | Ph(Mes)Br+Cl-   | 15.3    | 84.3    | 0.41    |         | 11.7   | 87.4   | 0.53   |        |
| 17   | Cl      | Mes(Ph)Cl+Cl-   | 16.7    | 82.8    | 0.48    |         | 17.7   | 81.9   | 0.45   |        |
| 9    | Cl      | Ph(Mes)Cl+Cl-   | 18.7    | 80.9    | 0.43    |         | 15.8   | 83.7   | 0.52   |        |
| 20   | At      | Mes(Ph)At+Cl-   | 4.83    | 94.8    | 0.24    |         | 7.8    | 91.8   | 0.22   |        |
| 12   | At      | Ph(Mes)At+Cl-   | 8.25    | 91.5    | 0.17    |         | 4.47   | 95.1   | 0.32   |        |
| 3    | I       | Ph(Mes)I+       | 11.2    | 88.4    | 0.29    |         | 11     | 88.5   | 0.38   |        |
| 2    | br      | Ph(Mes)br+      | 15.3    | 84.3    | 0.34    |         | 14.6   | 85.1   | 0.4    |        |
| 1    | cl      | Ph(Mes)cl+      | 18.7    | 81      | 0.39    |         | 18     | 81.6   | 0.42   |        |
| 4    | at      | Ph(Mes)at+      | 7.81    | 91.9    | 0.15    |         | 7.61   | 92.1   | 0.2    |        |
| 13   | Cl      | 5FPh(Mes)Cl+Cl- | 18.1    | 81.5    | 0.4     |         | 14     | 85.4   | 0.64   |        |
| 14   | Br      | 5FPh(Mes)Br+Cl- | 15.1    | 84.5    | 0.41    |         | 8.79   | 90.6   | 0.63   |        |
| 15   | I       | 5FPh(Mes)I+Cl-  | 12.5    | 87      | 0.39    | 0.08    | 3.64   | 95.6   | 0.66   | 0.11   |
| 16   | At      | 5FPh(Mes)At+Cl- | 8.37    | 91.3    | 0.18    | 0.13    | 1.97   | 97.5   | 0.37   | 0.15   |
| 5    | Cl      | 5FPh(Mes)Cl+    | 18.3    | 81.3    | 0.35    |         | 17.1   | 82.4   | 0.55   |        |
| 6    | Br      | 5FPh(Mes)Br+    | 15      | 84.6    | 0.33    |         | 13.5   | 86     | 0.5    |        |
| 7    | I       | 5FPh(Mes)I+     | 11.4    | 88.3    | 0.32    | 0.06    | 9.31   | 90.2   | 0.45   | 0.19   |
| 8    | At      | 5FPh(Mes)At+    | 7.84    | 91.9    | 0.15    | 0.1     | 6.11   | 93.5   | 0.23   | 0.15   |
| 21   | Cl      | Mes(5Fph)Cl+Cl- | 16.3    | 83.2    | 0.45    |         | 17.3   | 82.1   | 0.57   |        |
| 22   | Br      | Mes(5FPh)Br+Cl- | 12.2    | 87.4    | 0.46    |         | 13.9   | 85.6   | 0.56   |        |
| 23   | I       | Mes(5FPh)I+Cl-  | 7.29    | 92.2    | 0.49    | 0.07    | 10.2   | 89.2   | 0.5    | 0.1    |
| 24   | At      | Mes(5FPh)At+Cl- | 4.74    | 94.9    | 0.26    | 0.09    | 6.64   | 92.9   | 0.26   | 0.18   |

Table S6: Orbital contributions from X-Cl compounds

Orbital contributions are given as percentages.

| code | halogen | name | X-Cl S | X-Cl P | X-Cl D | X-Cl F |
|------|---------|------|--------|--------|--------|--------|
| 57   | Cl      | Cl2  | 6.37   | 92.8   | 0.87   |        |
| 58   | Br      | BrCl | 5.11   | 93.8   | 1.1    |        |
| 59   | I       | ICl  | 3.87   | 94.6   | 1.27   | 0.26   |
| 60   | At      | AtCl | 2.11   | 96.4   | 1.08   |        |

Table S7: Orbital contributions to bonds from monovalent halogen centers

Orbital contributions are given as percentages.

| Molid | halogen | name            | X-Mes S | X-Mes P | X-Mes D | X-Mes F | X-Ph S | X-Ph P | X-Ph D | X-Ph F |
|-------|---------|-----------------|---------|---------|---------|---------|--------|--------|--------|--------|
| 37    | Cl      | Climidazole     |         |         |         |         | 16.7   | 82.6   | 0.71   |        |
| 38    | Br      | Brimidazole     |         |         |         |         | 13.1   | 86.3   | 0.61   |        |
| 39    | I       | limidazole      |         |         |         |         | 8.6    | 90.8   | 0.5    | 0.11   |
| 40    | At      | Atimidazole     |         |         |         |         | 5.47   | 94.1   | 0.27   | 0.17   |
| 25    | Cl      | PhCl            |         |         |         |         | 18     | 81.5   | 0.53   |        |
| 26    | Br      | PhBr            |         |         |         |         | 14.5   | 85.1   | 0.47   |        |
| 27    | I       | PhI             |         |         |         |         | 10.6   | 89     | 0.39   | 0.08   |
| 28    | At      | PhAt            |         |         |         |         | 7.2    | 92.5   | 0.21   | 0.13   |
| 29    | Cl      | MesCl           | 18.7    | 80.8    | 0.54    |         |        |        |        |        |
| 30    | Br      | MesBr           | 14.5    | 85      | 0.44    |         |        |        |        |        |
| 31    | I       | MesI            | 10.6    | 89      | 0.33    | 0.07    |        |        |        |        |
| 32    | At      | MesAt           | 7.47    | 92.2    | 0.18    | 0.13    |        |        |        |        |
| 33    | Cl      | 5fph-cl         |         |         |         |         | 16.7   | 82.6   | 0.62   |        |
| 34    | Br      | 5fph-br         |         |         |         |         | 13.2   | 86.3   | 0.55   |        |
| 35    | I       | 5fph-i          |         |         |         |         | 9      | 90.4   | 0.48   | 0.09   |
| 36    | At      | 5fph-at         |         |         |         |         | 5.84   | 93.8   | 0.25   | 0.15   |
| 41    | Cl      | PhCl-Cl         |         |         |         |         | 35.6   | 82.1   | 0.57   |        |
| 42    | Br      | PhBr-Cl         |         |         |         |         | 12.8   | 86.7   | 0.58   |        |
| 43    | I       | PhI-Cl          |         |         |         |         | 8.62   | 90.8   | 0.51   | 0.08   |
| 44    | At      | PhAt-Cl         |         |         |         |         | 5.16   | 94.4   | 0.31   | 0.11   |
| 45    | Cl      | MesCl-Cl        | 18.1    | 81.4    | 0.58    |         |        |        |        |        |
| 46    | Br      | MesBr-Cl        | 13      | 86.5    | 0.52    |         |        |        |        |        |
| 47    | I       | MesI-Cl         | 8.82    | 90.7    | 0.43    | 0.07    |        |        |        |        |
| 48    | At      | MesAt-Cl        | 5.65    | 94      | 0.26    | 0.11    |        |        |        |        |
| 49    | Cl      | 5fphcl-cl       |         |         |         |         | 15.2   | 84.1   | 0.69   |        |
| 50    | Br      | 5fphbr-cl       |         |         |         |         | 10.9   | 88.4   | 0.7    |        |
| 51    | I       | 5fphi-cl        |         |         |         |         | 5.87   | 93.4   | 0.6    | 0.1    |
| 52    | At      | 5fphat-cl       |         |         |         |         | 3      | 96.5   | 0.34   | 0.14   |
| 53    | Cl      | Climidazole -Cl |         |         |         |         | 14.8   | 84.4   | 0.8    |        |
| 54    | Br      | Brimidazole -Cl |         |         |         |         | 10.3   | 89     | 0.73   |        |
| 55    | I       | limidazole -Cl  |         |         |         |         | 4.76   | 94.5   | 0.64   | 0.13   |
| 56    | At      | Atimidazole -Cl |         |         |         |         | 2.31   | 97.1   | 0.39   | 0.19   |

## QTAIM calculations

Table S8: Topology-based values at the X–Cl bond critical point (BCP).

All values given in atomic units (a.u.)

| Code | G(r)     | K(r)      | V(r)      | H(r)      | Laplacian<br>$\nabla^2\rho(r)$ | ELF      | $\rho(r)$ | X-Cl<br>Distance | X-CBP<br>distance | Cl-CBP<br>distance |
|------|----------|-----------|-----------|-----------|--------------------------------|----------|-----------|------------------|-------------------|--------------------|
| 9    | 1.25E-02 | -1.67E-03 | -1.08E-02 | 1.67E-03  | 5.66E-02                       | 5.61E-02 | 1.64E-02  | 3.07E+00         | 1.466717          | 1.598901           |
| 10   | 1.38E-02 | -1.33E-03 | -1.25E-02 | 1.33E-03  | 6.06E-02                       | 8.53E-02 | 2.00E-02  | 3.04E+00         | 1.488611          | 1.555691           |
| 11   | 1.83E-02 | 1.42E-03  | -1.97E-02 | -1.42E-03 | 6.75E-02                       | 1.72E-01 | 3.01E-02  | 2.95E+00         | 1.476403          | 1.478122           |
| 12   | 1.98E-02 | 1.19E-03  | -2.10E-02 | -1.19E-03 | 7.45E-02                       | 1.50E-01 | 3.00E-02  | 2.97E+00         | 1.49273           | 1.477197           |
| 17   | 1.16E-02 | -1.68E-03 | -9.90E-03 | 1.68E-03  | 5.30E-02                       | 5.36E-02 | 1.55E-02  |                  |                   |                    |
| 18   | 1.31E-02 | -1.39E-03 | -1.17E-02 | 1.39E-03  | 5.81E-02                       | 8.02E-02 | 1.90E-02  | 3.85E+00         | 1.818531          | 2.029324           |
| 19   | 1.68E-02 | 6.41E-04  | -1.74E-02 | -6.41E-04 | 6.47E-02                       | 1.51E-01 | 2.73E-02  | 3.44E+00         | 1.680344          | 1.763625           |
| 20   | 1.88E-02 | 8.14E-04  | -1.97E-02 | -8.14E-04 | 7.21E-02                       | 1.42E-01 | 2.85E-02  | 3.32E+00         | 1.666666          | 1.655634           |
| 41   | 2.35E-03 | -7.13E-04 | -1.63E-03 | 7.13E-04  | 1.22E-02                       | 1.19E-02 | 3.74E-03  | 3.25E+00         | 1.632031          | 1.616661           |
| 42   | 6.06E-03 | -1.41E-03 | -4.65E-03 | 1.41E-03  | 2.99E-02                       | 3.10E-02 | 8.85E-03  |                  |                   |                    |
| 43   | 9.33E-03 | -1.34E-03 | -7.99E-03 | 1.34E-03  | 4.27E-02                       | 5.81E-02 | 1.39E-02  |                  |                   |                    |
| 44   | 1.14E-02 | -1.27E-03 | -1.01E-02 | 1.27E-03  | 5.06E-02                       | 6.56E-02 | 1.63E-02  |                  |                   |                    |
| 45   | 3.13E-03 | -9.17E-04 | -2.21E-03 | 9.17E-04  | 1.62E-02                       | 1.51E-02 | 4.78E-03  |                  |                   |                    |
| 46   | 5.28E-03 | -1.29E-03 | -3.98E-03 | 1.29E-03  | 2.63E-02                       | 2.76E-02 | 7.86E-03  |                  |                   |                    |
| 47   | 8.46E-03 | -1.35E-03 | -7.11E-03 | 1.35E-03  | 3.92E-02                       | 5.25E-02 | 1.27E-02  |                  |                   |                    |
| 48   | 1.06E-02 | -1.31E-03 | -9.25E-03 | 1.31E-03  | 4.75E-02                       | 6.07E-02 | 1.52E-02  |                  |                   |                    |
| 53   | 1.09E-02 | -1.82E-03 | -9.13E-03 | 1.82E-03  | 5.11E-02                       | 4.43E-02 | 1.41E-02  | 3.10E+00         | 1.473612          | 1.631032           |
| 54   | 1.21E-02 | -1.79E-03 | -1.03E-02 | 1.79E-03  | 5.56E-02                       | 6.57E-02 | 1.70E-02  | 3.09E+00         | 1.496012          | 1.589794           |
| 55   | 2.01E-02 | 1.95E-03  | -2.20E-02 | -1.95E-03 | 7.26E-02                       | 1.72E-01 | 3.18E-02  | 2.90E+00         | 1.43282           | 1.464409           |
| 56   | 2.26E-02 | 1.93E-03  | -2.45E-02 | -1.93E-03 | 8.27E-02                       | 1.55E-01 | 3.29E-02  | 2.89E+00         | 1.436487          | 1.457949           |
| 57   | 6.13E-02 | 6.45E-02  | -1.26E-01 | -6.45E-02 | -1.31E-02                      | 7.80E-01 | 1.45E-01  |                  |                   |                    |
| 58   | 5.28E-02 | 4.13E-02  | -9.41E-02 | -4.13E-02 | 4.60E-02                       | 5.68E-01 | 9.88E-02  |                  |                   |                    |
| 59   | 5.16E-02 | 4.16E-02  | -9.31E-02 | -4.16E-02 | 4.00E-02                       | 5.85E-01 | 9.94E-02  |                  |                   |                    |
| 60   | 5.25E-02 | 3.04E-02  | -8.29E-02 | -3.04E-02 | 8.84E-02                       | 4.83E-01 | 8.88E-02  |                  |                   |                    |

## References

1. Engelage, E.; Schulz, N.; Heinen, F.; Huber, S. M.; Truhlar, D. G.; Cramer, C. J. *Chemistry* **2018**, *24* (60), 15983-15987.
2. Wang, Y.; Verma, P.; Jin, X.; Truhlar, D. G.; He, X. *Proc Natl Acad Sci U S A* **2018**, *115* (41), 10257-10262.
3. Kozuch, S.; Martin, J. M. *J Chem Theory Comput* **2013**, *9* (4), 1918-31.
4. Forni, A.; Pieraccini, S.; Franchini, D.; Sironi, M. *J Phys Chem A* **2016**, *120* (45), 9071-9080.
5. Anderson, L. N.; Aquino, F. W.; Raeber, A. E.; Chen, X.; Wong, B. M. *J Chem Theory Comput* **2018**, *14* (1), 180-190.
6. Sethio, D.; Raggi, G.; Lindh, R.; Erdelyi, M. *J Chem Theory Comput* **2020**, *16* (12), 7690-7701.
7. Weigend, F.; Ahlrichs, R. *Phys Chem Chem Phys* **2005**, *7* (18), 3297-305.
8. Siiskonen, A.; Priimagi, A. *J Mol Model* **2017**, *23* (2), 50.
9. Frisch, M. J.; Trucks, G. W.; Schlegel, H. B.; Scuseria, G. E.; Robb, M. A.; Cheeseman, J. R.; Scalmani, G.; Barone, V.; Mennucci, B.; Petersson, G. A.; Nakatsuji, H.; Caricato, M.; Li, X.; Hratchian, H. P.; Izmaylov, A. F.; Bloino, J.; Zheng, G.; Sonnenberg, J. L.; Hada, M.; Ehara, M.; Toyota, K.; Fukuda, R.; Hasegawa, J.; Ishida, M.; Nakajima, T.; Honda, Y.; Kitao, O.; Nakai, H.; Vreven, T.; Jr., J. A. M.; Peralta, J. E.; Ogliaro, F.; Bearpark, M.; Heyd, J. J.; Brothers, E.; Kudin, K. N.; Staroverov, V. N.; Keith, T.; Kobayashi, R.; Normand, J.; Raghavachari, K.; Rendell, A.; Burant, J. C.; Iyengar, S. S.; Tomasi, J.; Cossi, M.; Rega, N.; Millam, J. M.; Klene, M.; Knox, J. E.; Cross, J. B.; Bakken, V.; Adamo, C.; Jaramillo, J.; Gomperts, R.; Stratmann, R. E.; Yazyev, O.; Austin, A. J.; Cammi, R.; Pomelli, C.; Ochterski, J. W.; Martin, R. L.; Morokuma, K.; Zakrzewski, V. G.; Voth, G. A.; Salvador, P.; Dannenberg, J. J.; Dapprich, S.; Daniels, A. D.; Farkas, O.; Foresman, J. B.; Ortiz, J. V.; Cioslowski, J.; Fox, D. J. *Gaussian 09 Revision D.01*, Gaussian, Inc.: Wallingford, CT, 2016.
10. Lu, T.; Chen, F. *J Comput Chem* **2012**, *33* (5), 580-92.
11. *J Mol Graph Model* **2012**, *38*, 314-23.
12. Donald, K. J.; Pham, N.; Ravichandran, P. *The Journal of Physical Chemistry A* **2023**.
13. Glendening, E. D.; Badenhop, J. K.; Reed, A. E.; Carpenter, J. E.; Bohmann, J. A.; Morales, C. M.; Karafiloglou, P.; Landis, C. R.; Weinhold, F. *NBO 7.0, 7.0*; Theoretical Chemistry Institute, University of Wisconsin Madison: Madison, Wisconsin, 2018.
14. Glendening, E. D.; Landis, C. R.; Weinhold, F. *J Comput Chem* **2019**, *40* (25), 2234-2241.
