# Supplementary material for: A comparison of structure, bonding and non-covalent interactions of aryl halide and diarylhalonium halogen-bond donors
Source: Beilstein J Org Chem. 2024 Jun 27;20:1428–35. doi: 10.3762/bjoc.20.125 (PMC11216093; doi:10.3762/bjoc.20.125)
Supplement: File 2 — Coordinates of optimized structures. [file Beilstein_J_Org_Chem-20-1428-s002.xyz]

    32
 structure 1 ph(mes)cl+
C       1.66395847      1.23853175     -0.22353590
C       0.88064788      0.16508512     -0.64025668
C       1.16720991     -1.18619319     -0.48942601
C       2.37238053     -1.46114303      0.15840207
C       3.21887796     -0.44946216      0.60919263
C       2.85216775      0.88385454      0.41066365
H       2.64804383     -2.50013644      0.30803196
H       3.50659331      1.67751809      0.75850348
C      -4.04095572     -0.76436604      0.19652475
C      -3.95406843     -0.26334672      1.49171712
C      -2.85373999      0.49166632      1.89080968
C      -1.82364015      0.76379181      0.99509160
C      -1.96117804      0.23937211     -0.27423721
C      -3.02262675     -0.52028104     -0.72269947
H      -4.89609874     -1.35588653     -0.10749754
H      -4.75019998     -0.46425070      2.19863007
H      -2.79113395      0.87945166      2.90040465
H      -0.96056389      1.35177493      1.28461045
H      -3.06019427     -0.91380428     -1.73122609
C       1.28164439      2.67697628     -0.43140429
H       1.20979824      2.91982439     -1.49427165
H       0.31877667      2.90982348      0.03066951
H       2.03388270      3.32779861      0.01167380
C       4.51571505     -0.77688385      1.29363797
H       5.36278511     -0.49860359      0.66093546
H       4.61257546     -0.22195115      2.22915529
H       4.59234617     -1.84191930      1.51319083
C       0.25723777     -2.28565035     -0.95349581
H      -0.66199879     -2.31103931     -0.36140666
H      -0.02108973     -2.16575348     -2.00320612
H       0.75195321     -3.24953137     -0.84245014
Cl     -0.65983877      0.58499856     -1.48362658


    32
 structure 2 ph(mes)Br+
C       1.75623361      0.90318355      0.77047490
C       1.00418554      0.41937527     -0.29854193
C       1.32547562     -0.66167033     -1.11650881
C       2.53063383     -1.29419400     -0.81261008
C       3.35022201     -0.86724226      0.23231080
C       2.94767635      0.21958214      1.00924908
H       2.82967070     -2.14515256     -1.41617887
H       3.57436363      0.55223397      1.83076329
C      -2.62206238     -1.33351542      1.83451063
C      -3.78762782     -1.61517412      1.12653528
C      -4.02527860     -1.02667527     -0.11139836
C      -3.09603677     -0.14788504     -0.66532744
C      -1.96008896      0.10026720      0.08140750
C      -1.67725177     -0.45209462      1.31592033
H      -2.44033008     -1.79441235      2.79815861
H      -4.51533539     -2.30157097      1.54301238
H      -4.93035329     -1.25187358     -0.66289075
H      -3.26282295      0.30451773     -1.63557943
H      -0.76545800     -0.22353935      1.85628888
C       1.34781341      2.06521942      1.63213085
H       1.28891153      2.99200326      1.05605799
H       0.37340587      1.89995436      2.09967105
H       2.07897832      2.21112759      2.42614651
C       4.65959577     -1.55074087      0.50627445
H       5.47206170     -1.02384671     -0.00265854
H       4.88757505     -1.55407822      1.57317084
H       4.65388608     -2.57978261      0.14553110
C       0.45304654     -1.15134515     -2.23585124
H       0.28189262     -0.37257135     -2.98291496
H       0.92695398     -1.99676149     -2.73262088
H      -0.52135257     -1.48327761     -1.86564592
Br     -0.66203616      1.34641391     -0.67547906


    32
 Structure 3 Ph(mes)I+
C      -2.61607038      1.35934948     -0.98071669
C      -1.41785832      0.66201615     -1.14176622
C      -1.15545965     -0.32219018     -0.18557998
C      -1.99350536     -0.65123499      0.88550103
C      -3.17382130      0.08375097      0.97712186
C      -3.49773000      1.08769162      0.06334413
H      -2.86106434      2.13464445     -1.69979858
H      -3.85871619     -0.13791444      1.78990854
I       0.65393239     -1.39527691     -0.35888456
C      -1.68831399     -1.72332235      1.89590096
H      -1.58502908     -2.70497847      1.42663207
H      -0.76334557     -1.51257968      2.43983500
H      -2.49484390     -1.78922218      2.62517038
C      -0.49539807      0.99441121     -2.28014938
H       0.45335155      1.40055100     -1.91807333
H      -0.27535424      0.11574224     -2.89205081
H      -0.95160201      1.74457556     -2.92495858
C      -4.77118486      1.86854367      0.22029590
H      -5.60715044      1.21114447      0.46654178
H      -4.67479950      2.59263765      1.03436718
H      -5.01664950      2.41777347     -0.68897974
C       3.00847706      0.45909605     -0.69131150
C       3.88539405      1.47364170     -0.31371568
C       3.70945535      2.14145737      0.89414461
C       2.65958107      1.80393726      1.74465342
C       1.77578243      0.78524098      1.40113710
C       1.98185340      0.14682967      0.18721647
H       3.12997999     -0.05162384     -1.63960113
H       4.70034852      1.74190820     -0.97555481
H       4.39414989      2.93294669      1.17538943
H       2.52518183      2.32619416      2.68461578
H       0.95991755      0.51256539      2.06098207


    32
 Structure 4 Ph(mes)At+
C      -1.57826793      0.73408416      1.16260451
C      -1.29306259     -0.15285545      0.12234118
C      -2.13563191     -0.41585315     -0.96083957
C      -3.34927376      0.27258269     -0.96989500
C      -3.70159210      1.17073203      0.03678667
C      -2.80776622      1.39130260      1.08305510
H      -4.03604494      0.09736965     -1.79236382
H      -3.06799093      2.09350239      1.86899635
C       2.30677681      2.50478345     -1.51732830
C       3.42647937      2.75262527     -0.72748986
C       3.76175177      1.89095956      0.31221262
C       2.97621385      0.77081219      0.57942547
C       1.87495968      0.55430775     -0.23345185
C       1.51119873      1.38622801     -1.28032405
H       2.04718907      3.17682885     -2.32702203
H       4.03948496      3.62469834     -0.92340264
H       4.63075829      2.08831064      0.92915136
H       3.22261938      0.10595099      1.39910802
H       0.63951516      1.18598877     -1.89320373
C      -0.65026027      1.00713110      2.31334047
H      -0.42143562      0.09300568      2.86745634
H       0.29453550      1.43815616      1.97074719
H      -1.10645867      1.71347346      3.00608530
C      -5.03253204      1.86827036      0.00290932
H      -5.80496128      1.23136814      0.44379889
H      -5.00797773      2.79972965      0.56979766
H      -5.33611881      2.09090713     -1.02119649
C      -1.80620809     -1.37260531     -2.07459796
H      -1.69014243     -2.39471343     -1.70462166
H      -2.60645826     -1.37651904     -2.81410858
H      -0.88009279     -1.09447652     -2.58419015
At      0.63608079     -1.21233662      0.17544089


    32
 structure 5 
C      -2.68220142      0.71577211      0.83834442
C      -1.81195254     -0.32782839      0.54159925
C      -1.92410059     -1.27825314     -0.46375152
C      -3.04180560     -1.11154256     -1.28267136
C      -3.96533279     -0.08657544     -1.08032607
C      -3.77433455      0.80503061     -0.02252438
H      -3.18789493     -1.81585691     -2.09536781
H      -4.49659205      1.59717586      0.14770596
C       3.14294702     -0.75577477     -0.17726612
C       3.29522408      0.51633662     -0.70867034
C       2.31955247      1.48580359     -0.52297386
C       1.18328838      1.18307753      0.20403212
C       1.03335953     -0.09246546      0.72843219
C       2.00449136     -1.06618321      0.54522867
C      -2.51325573      1.65855610      1.99623123
H      -2.57093189      1.12742896      2.94993283
H      -1.55678572      2.18299522      1.96017208
H      -3.30697096      2.40430712      1.98153559
C      -5.17026959      0.04481391     -1.96723057
H      -6.05017848     -0.37708517     -1.47333127
H      -5.38653824      1.09258097     -2.18199512
H      -5.03003844     -0.48382374     -2.91038979
C      -0.94728912     -2.39418802     -0.69274920
H      -0.03321720     -2.02769740     -1.16867243
H      -0.67689454     -2.90038369      0.23640830
H      -1.38615169     -3.13465101     -1.35988709
Cl     -0.38486409     -0.48990787      1.67884409
F       0.25111291      2.09772471      0.38988965
F       2.47893555      2.69319876     -1.03350686
F       4.37757464      0.80684159     -1.39971717
F       4.07890890     -1.66832732     -0.36499174
F       1.85068558     -2.27566366      1.04824973


    32
 structure 6
C       2.73095829      0.32268938     -0.88463715
C       1.83236297     -0.46338472     -0.16653571
C       1.85667007     -0.75063363      1.19390719
C       2.90235907     -0.14496338      1.89293775
C       3.84358274      0.66846135      1.26378614
C       3.74624551      0.88373394     -0.11242396
H       2.97368095     -0.32390901      2.96113805
H       4.48171261      1.50826764     -0.61016754
C      -2.31981394      1.70668536     -0.18696058
C      -3.31370414      0.99882341      0.47394990
C      -3.22011433     -0.37560484      0.63381755
C      -2.12125747     -1.05063707      0.13135904
C      -1.13166915     -0.34030531     -0.53316235
C      -1.22428341      1.03399992     -0.69662883
C       2.66432693      0.55495002     -2.36741073
H       2.79950342     -0.37640854     -2.92357662
H       1.71123388      0.99486086     -2.66778353
H       3.45770716      1.23710233     -2.66877291
C       4.96696470      1.28826970      2.04403984
H       5.89163718      0.72579061      1.88673527
H       5.14982232      2.31417573      1.71972897
H       4.75389220      1.29203544      3.11306639
C       0.84932451     -1.60927916      1.90127549
H       0.66639973     -2.54930296      1.37578360
H       1.20609734     -1.84963278      2.90155047
H      -0.10412340     -1.08456827      2.01169724
Br      0.37629267     -1.26464925     -1.21573593
F      -2.02398138     -2.35766372      0.29194127
F      -4.17145052     -1.03419483      1.27138846
F      -4.35843060      1.64041297      0.95430433
F      -2.42421032      3.01576213     -0.32998880
F      -0.27537712      1.70216415     -1.32664845


    32
 structure 7
C      -3.02918415      1.07623249     -1.25308764
C      -1.93464157      0.28218674     -1.59912713
C      -1.34790366     -0.41860516     -0.54293821
C      -1.77409558     -0.40162616      0.79017068
C      -2.87263561      0.41272876      1.05235097
C      -3.50327394      1.15846455      0.05427994
H      -3.52070596      1.64169876     -2.03835241
H      -3.24692692      0.46006822      2.07042804
I       0.32823825     -1.62805068     -0.98645285
C      -1.14437306     -1.20407161      1.89481620
H      -1.21763315     -2.27846138      1.70514460
H      -0.08942101     -0.95385578      2.02888469
H      -1.65552920     -1.00303843      2.83494380
C      -1.44982233      0.24508334     -3.02038379
H      -0.50894029      0.79199601     -3.13138555
H      -1.29827901     -0.77508637     -3.38036382
H      -2.17972066      0.72128508     -3.67346603
C      -4.66819626      2.04161807      0.39662275
H      -5.37403071      1.52470986      1.04947437
H      -4.32267465      2.93153042      0.93027706
H      -5.19551326      2.36914834     -0.49943255
C       2.23807206      0.00704456     -2.65357818
C       3.14752340      1.01624397     -2.91640348
C       3.51214068      1.88991713     -1.90298908
C       2.97924433      1.75931118     -0.62871134
C       2.07585467      0.74513639     -0.36923102
C       1.70340451     -0.12956489     -1.38009164
F       1.56735196      0.62330100      0.84702388
F       3.33626167      2.60079188      0.32651832
F       1.88585632     -0.81810910     -3.62693850
F       3.66402647      1.15452696     -4.12571277
F       4.37299641      2.85535276     -2.15370132


    32
 structure 8
C      -1.90404122      0.56846238      1.48759716
C      -1.88452201      0.03700923      0.19665308
C      -2.73220425      0.40822923     -0.85029002
C      -3.65379817      1.41102553     -0.54809085
C      -3.72741249      1.99874129      0.71450862
C      -2.85490912      1.56608959      1.71114786
H      -4.33427210      1.73712693     -1.32841862
H      -2.90841611      2.01336355      2.69904945
C       2.59683135      1.60181224     -1.07360061
C       3.54162691      1.43131605     -0.07312535
C       3.39071156      0.43154309      0.87533873
C       2.28595780     -0.40062692      0.81958225
C       1.33969765     -0.23912587     -0.17993149
C       1.49812818      0.76203070     -1.12477070
C      -0.97952021      0.15665590      2.59882795
H      -0.95847941     -0.92672780      2.73603156
H       0.04250509      0.49692424      2.41181376
H      -1.30444145      0.60552794      3.53645175
C      -4.75359663      3.05707081      1.00314718
H      -5.69457036      2.59449266      1.31519331
H      -4.42677903      3.71733049      1.80735198
H      -4.96079407      3.65896545      0.11727178
C      -2.71191308     -0.21073729     -2.22153900
H      -2.93004262     -1.28160704     -2.18016303
H      -3.46740099      0.25534117     -2.85308830
H      -1.74274986     -0.08076837     -2.70896650
At     -0.39512714     -1.53112151     -0.24571895
F       2.14855788     -1.34771179      1.73819755
F       4.29763889      0.28118238      1.82805036
F       4.59272380      2.22753673     -0.02245703
F       2.75220485      2.56009513     -1.97363759
F       0.60498901      0.93205122     -2.09005830


    33
 Structure 9
C       1.46054354     -0.14031606      1.14874950
C       0.73620976      0.07216927     -0.01897855
C       0.96141712     -0.51474928     -1.25540732
C       2.01727652     -1.42736708     -1.29236178
C       2.78729263     -1.71160414     -0.16591285
C       2.49912195     -1.06161844      1.03660365
H       2.24037784     -1.91849277     -2.23432053
H       3.10380921     -1.26720112      1.91492173
C      -4.28502985     -0.23642732     -0.58925803
C      -4.32156060     -1.35926151      0.23147726
C      -3.21757812     -1.70600252      1.00672212
C      -2.06288984     -0.92972454      0.97569304
C      -2.07148934      0.17291968      0.14235299
C      -3.13971311      0.55454559     -0.64710431
H      -5.14304901      0.02906065     -1.19526149
H      -5.21568282     -1.97052615      0.26620552
H      -3.24935704     -2.58078646      1.64524233
H      -1.19609951     -1.18624653      1.57330379
H      -3.08622997      1.42692204     -1.28814157
C       1.18059134      0.58858778      2.43021618
H       1.32355694      1.66324005      2.28733078
H       0.15503183      0.42897700      2.77428514
H       1.85900551      0.24763777      3.21132837
C       3.93282310     -2.68278353     -0.23877189
H       4.88592829     -2.15499836     -0.14702542
H       3.88412643     -3.40957802      0.57507474
H       3.93678694     -3.22442078     -1.18504620
C       0.15335673     -0.19240582     -2.47806273
H      -0.88994501     -0.50033735     -2.36320774
H       0.16720351      0.88112902     -2.68373618
H       0.56327441     -0.71045603     -3.34417633
Cl     -0.62519281      1.24866134      0.08532621
Cl      1.61807702      3.32135657     -0.17488624


    33
 structure 10
C       1.57856797     -0.26147780      1.13238848
C       0.85549891     -0.04877350     -0.03880142
C       1.07293480     -0.66855023     -1.26312064
C       2.11482827     -1.59854254     -1.28457656
C       2.88287038     -1.87476497     -0.15563953
C       2.60317748     -1.20079150      1.03484211
H       2.32776401     -2.11081395     -2.21762315
H       3.20341838     -1.40206931      1.91731374
C      -3.09626474     -1.96381229      1.02231158
C      -4.22948464     -1.69984030      0.25678191
C      -4.27602860     -0.58316917     -0.57151218
C      -3.18695112      0.28276071     -0.64608706
C      -2.08097636     -0.01182561      0.13317619
C      -1.99832309     -1.10973944      0.97284448
H      -3.06184568     -2.83408280      1.66728772
H      -5.07932863     -2.37079508      0.30458995
H      -5.15584977     -0.38032155     -1.17081472
H      -3.20944800      1.14835579     -1.29822327
H      -1.11227630     -1.30840731      1.56484320
C       1.31620627      0.47480602      2.41439381
H       1.45062242      1.55007351      2.26892077
H       0.29846987      0.30889801      2.77843544
H       2.00978826      0.14119066      3.18538627
C       4.01590028     -2.86151246     -0.21297637
H       4.97532583     -2.34492146     -0.12337348
H       3.95504424     -3.57852610      0.60874549
H       4.01637604     -3.41377617     -1.15314503
C       0.27587327     -0.36674590     -2.49899348
H       0.34382916      0.69300375     -2.75832601
H       0.65511339     -0.94614333     -3.33994003
H      -0.78142136     -0.61444900     -2.36732293
Br     -0.59330327      1.24189491      0.04937860
Cl      1.69665048      3.23225508     -0.19795252


    33
 structure 11
C      -2.28908418     -1.68376213      1.29592410
C      -1.24524910     -0.75507306      1.28189210
C      -0.97889307     -0.13954801      0.05832800
C      -1.69067013     -0.38818503     -1.11972708
C      -2.72117521     -1.32278210     -1.03579208
C      -3.03043523     -1.98047415      0.15538801
H      -2.52621719     -2.18137917      2.23135617
H      -3.30016025     -1.53803412     -1.92934615
I       0.59513804      1.25278509     -0.02555500
C      -1.40270111      0.30616002     -2.42161319
H      -1.54256812      1.38606510     -2.32334218
H      -0.37377203      0.13276401     -2.74894821
H      -2.07381716     -0.05657000     -3.19982124
C      -0.48692604     -0.45371303      2.54477619
H       0.57833304     -0.67660005      2.43512919
H      -0.57922805      0.60203304      2.81333822
H      -0.87476507     -1.04986208      3.37044526
C      -4.14220732     -2.99254823      0.19329101
H      -5.04107139     -2.60432920     -0.29045002
H      -3.85354129     -3.90289430     -0.33977603
H      -4.39440434     -3.26845225      1.21781709
C       3.24274325     -0.07178601      0.62820805
C       4.25267532     -1.02887108      0.54869004
C       4.09253331     -2.14895516     -0.26092302
C       2.92334422     -2.31777918     -0.99916608
C       1.90970814     -1.36530210     -0.93778807
C       2.08616116     -0.25510902     -0.11990301
H       3.36010926      0.79643306      1.26762910
H       5.15985240     -0.89714807      1.12766809
H       4.87858337     -2.89363022     -0.31588102
H       2.79722121     -3.19060724     -1.62985713
H       1.00129708     -1.49617012     -1.51586212
Cl     -1.63983112      3.17806724      0.13616601


    33
 structure 12
C       2.46756473      1.84289457      1.26522485
C       1.38651783      0.96177410      1.26187099
C       1.14102657      0.29185008      0.06065003
C       1.90005448      0.44024421     -1.09897052
C       2.97010926      1.33713362     -1.02480606
C       3.26416815      2.04417748      0.13763172
H       2.69407070      2.38169347      2.18095689
H       3.58807715      1.47652055     -1.90666208
C       1.63396286     -0.30671507     -2.37722456
H       1.69435653     -1.38671340     -2.21905992
H       0.64094815     -0.08119157     -2.77593120
H       2.36989628     -0.03248562     -3.13263311
C       0.56928659      0.76484651      2.50871964
H      -0.47530535      1.05109601      2.35631107
H       0.58700114     -0.28004058      2.82942303
H       0.96795561      1.37362925      3.31981007
C       4.41569790      3.01052392      0.18875458
H       5.01030769      2.96915925     -0.72439372
H       4.05506976      4.03534475      0.31192512
H       5.07082331      2.79231046      1.03519368
C      -3.18345838      0.53393386      0.58934552
C      -4.10576460      1.57555579      0.49995224
C      -3.84021308      2.67768092     -0.30689029
C      -2.65398599      2.74278711     -1.03374911
C      -1.72800898      1.70458011     -0.96178626
C      -2.00707886      0.61345257     -0.14679197
H      -3.38799499     -0.31758732      1.22972389
H      -5.02693969      1.52418429      1.06960078
H      -4.55775511      3.48809848     -0.36886142
H      -2.44553903      3.60098255     -1.66290326
H      -0.80665353      1.75915831     -1.53251335
At     -0.57409374     -1.07643826     -0.01373772
Cl      1.49649285     -3.19207206      0.22271382


    33
 structure 13
C      -2.38043124     -0.60594001     -0.88422866
C      -1.58321062      0.05636842      0.04128264
C      -1.61327713     -0.05525702      1.42157610
C      -2.53453866     -0.98792206      1.90516827
C      -3.36083872     -1.72091425      1.05679366
C      -3.27416546     -1.51489100     -0.32210198
H      -2.60769063     -1.12420613      2.97952392
H      -3.93150621     -2.06494566     -0.98874322
C       3.33814520      0.53653417      0.61066910
C       3.62429212     -0.69682099      0.04788631
C       2.67919304     -1.35693660     -0.72267367
C       1.44283302     -0.77561320     -0.93792686
C       1.15253316      0.45549665     -0.37020080
C       2.09775840      1.11468575      0.40162384
C      -2.35229718     -0.33983360     -2.36032311
H      -2.63029101      0.69946095     -2.55441773
H      -1.36546376     -0.51290092     -2.79317277
H      -3.06419530     -0.99061746     -2.86635445
C      -4.36111633     -2.69715619      1.60972849
H      -5.37395149     -2.29505921      1.51994762
H      -4.33462033     -3.63970869      1.05925756
H      -4.17317100     -2.90525314      2.66342022
C      -0.75274158      0.74818040      2.35258257
H       0.27546959      0.37461524      2.36818031
H      -0.73451076      1.80428866      2.07451531
H      -1.14151117      0.67561617      3.36757139
Cl     -0.39264115      1.25943920     -0.65476291
Cl     -2.73554297      3.01758221     -0.89627343
F       0.54873335     -1.40383691     -1.68087996
F       2.96516271     -2.53400670     -1.25494378
F       4.80530001     -1.24971188      0.24913374
F       4.24628838      1.15523717      1.34736816
F       1.82648710      2.28892536      0.94362786


    33
 structure 14
C       2.37558113      0.70263448     -0.84520830
C       1.58870958      0.09993754      0.13269750
C       1.54181416      0.42699202      1.48216865
C       2.36112664      1.49435990      1.85815041
C       3.17108389      2.16470951      0.94511095
C       3.16525426      1.75762430     -0.38984222
H       2.36587810      1.79238465      2.90199044
H       3.80347425      2.26525924     -1.10686595
C      -2.74263802      1.28566627     -0.93360763
C      -3.68057394      0.79300867     -0.03967978
C      -3.39977875     -0.32531637      0.72822765
C      -2.17183105     -0.95141173      0.59886178
C      -1.22887009     -0.46370030     -0.29159772
C      -1.51999493      0.65081234     -1.06051396
C       2.43408858      0.25738583     -2.27759924
H       2.77056009     -0.78024111     -2.34001902
H       1.46115472      0.32888165     -2.76714289
H       3.13660362      0.88045110     -2.82977314
C       4.07007939      3.28466886      1.38980118
H       5.09929164      2.92761067      1.48667951
H       4.07366445      4.09866135      0.66254525
H       3.76116647      3.68245357      2.35702338
C       0.69101902     -0.27926298      2.49803240
H       0.77545060     -1.36509868      2.41720676
H       1.00122861      0.00693913      3.50221900
H      -0.36304829     -0.00613274      2.39214587
Br      0.45693819     -1.38976007     -0.45360557
Cl      2.86162057     -2.89938529     -0.49507523
F      -1.91077663     -2.01523363      1.34565197
F      -4.30084633     -0.78489628      1.58349545
F      -4.84991626      1.39573436      0.08188810
F      -3.02323462      2.35588726     -1.66230149
F      -0.63258504      1.12754537     -1.92135018


    33
 structure 15
C       2.17993892      1.89451897      1.82075462
C       1.50482790      0.70991054      1.51410793
C       1.58865045      0.28399787      0.18878794
C       2.30937216      0.93452768     -0.81775688
C       2.96001845      2.10673708     -0.43774912
C       2.90381305      2.60218065      0.86576226
H       2.13994891      2.26056497      2.84185741
H       3.53384645      2.64333979     -1.18772225
I       0.56627915     -1.48831711     -0.33010098
C       2.43387481      0.42705580     -2.22685092
H       2.93141902     -0.54588969     -2.24713655
H       1.46034845      0.31592067     -2.70863702
H       3.02627848      1.12148008     -2.82195811
C       0.75805335     -0.02810331      2.59020725
H      -0.32042147     -0.02135815      2.41025191
H       1.08107826     -1.06975076      2.66107760
H       0.93236009      0.44302678      3.55705821
C       3.62595533      3.87192708      1.22229149
H       4.69131617      3.78905477      0.99401875
H       3.23541305      4.71486114      0.64654095
H       3.52091858      4.10511552      2.28232393
C      -2.30501389     -0.87289840      0.61938351
C      -3.52929960     -0.23135492      0.70234696
C      -3.77259776      0.87027964     -0.10057513
C      -2.79911374      1.32202292     -0.97687428
C      -1.58508195      0.66102654     -1.04273285
C      -1.31756044     -0.44038720     -0.24867379
Cl      2.99459327     -2.65672512     -0.26258620
F      -0.66982103      1.11456747     -1.89935953
F      -3.04115365      2.37886848     -1.74395372
F      -4.93909214      1.49360454     -0.03178730
F      -4.46507949     -0.65729529      1.54293372
F      -2.09467690     -1.92750930      1.40961886


    33
 structure 16
C       2.39682225      1.81281172      1.29302835
C       1.33187121      0.91392799      1.24066913
C       1.13519188      0.27028745      0.01626382
C       1.92977221      0.44430120     -1.11566188
C       2.97965339      1.35895014     -0.98914265
C       3.22210846      2.05139321      0.19371303
H       2.58787508      2.33422022      2.22663552
H       3.62409109      1.52350135     -1.84724951
C       1.73511710     -0.29662419     -2.40956743
H       1.83711053     -1.37508852     -2.26257100
H       0.75008837     -0.10724584     -2.84129080
H       2.48563097      0.01655356     -3.13463589
C       0.49295581      0.66978059      2.46478225
H      -0.54618321      0.97466824      2.31433806
H       0.49534854     -0.38756882      2.74174362
H       0.88549458      1.23827957      3.30733153
C       4.35221135      3.03807371      0.29781163
H       4.97721075      3.02233767     -0.59558019
H       3.96741976      4.05362432      0.42403025
H       4.98277435      2.81936510      1.16253718
C      -2.99147955      0.70227736      0.73401183
C      -3.88325947      1.76188970      0.72021630
C      -3.76623246      2.73213709     -0.26090161
C      -2.76840710      2.63675137     -1.21709218
C      -1.89361950      1.56443326     -1.17895194
C      -1.98773588      0.58378566     -0.20935314
At     -0.54213494     -1.14653542     -0.13156392
Cl      1.35857751     -3.15130906      0.05668881
F      -3.12673081     -0.21475281      1.69713585
F      -4.84383910      1.85714952      1.63407011
F      -4.61302000      3.75173732     -0.28807385
F      -2.66549221      3.56895452     -2.15897343
F      -0.94429912      1.49990423     -2.11605214


    33
 structure 17
C       1.86178091     -0.98327908     -0.86649059
C       1.10348725     -0.49181618      0.19325211
C       1.56247138      0.33664844      1.21329241
C       2.90525420      0.70232243      1.12810576
C       3.73076372      0.25471591      0.09640937
C       3.19660070     -0.58117323     -0.88507551
H       3.31097390      1.35416133      1.89559031
H       3.83163255     -0.93324367     -1.69234568
C      -1.79257686      2.33197252     -1.62540282
C      -2.86291704      2.74171165     -0.83515603
C      -3.24657766      2.00054044      0.27911348
C      -2.56291754      0.83687294      0.62222930
C      -1.51070711      0.47805524     -0.19454995
C      -1.08983122      1.17132189     -1.31097375
H      -1.49993671      2.90752474     -2.49543694
H      -3.40410662      3.64524029     -1.09080993
H      -4.08173718      2.32036200      0.89075323
H      -2.84786633      0.23116029      1.47243947
H      -0.25376982      0.83771519     -1.91431872
C       1.29803028     -1.88240479     -1.93117921
H       0.95698372     -2.83253328     -1.51283325
H       0.44495413     -1.42097868     -2.43523142
H       2.05914221     -2.09699043     -2.68007076
C       5.18194739      0.64520451      0.05637825
H       5.79009013     -0.10322061      0.57282113
H       5.54535989      0.71221195     -0.97020813
H       5.34846007      1.60399273      0.54921391
C       0.68593403      0.83928205      2.32363643
H       0.11136245      0.03298302      2.78533238
H       1.29441806      1.30851300      3.09575810
H      -0.02427664      1.58491305      1.95465037
Cl     -0.61135258     -1.02647977      0.25611252
Cl     -3.35018497     -2.47655902      0.44936751


    33
 structure 18
C       2.00607163     -0.90534422     -0.90134084
C       1.21744213     -0.45050927      0.15663612
C       1.66365454      0.36186577      1.19968880
C       3.00477842      0.74030544      1.14568587
C       3.85218273      0.32134856      0.12070610
C       3.33885120     -0.49327979     -0.88825422
H       3.39260446      1.37957553      1.93291579
H       3.99032209     -0.82099282     -1.69288666
C      -1.54683547      2.63609694     -1.54343063
C      -2.62781704      3.07322926     -0.78340382
C      -3.12465751      2.29034919      0.25481954
C      -2.54629520      1.05811683      0.55032561
C      -1.47656508      0.66936750     -0.23242757
C      -0.94756922      1.40770472     -1.27398840
H      -1.16379848      3.24349080     -2.35496140
H      -3.08753970      4.02990090     -1.00270018
H      -3.96670684      2.63148415      0.84538204
H      -2.92574267      0.42680067      1.34327068
H      -0.10420016      1.05925394     -1.85870112
C       1.48574528     -1.78244854     -2.00766130
H       1.15348291     -2.75286950     -1.63057917
H       0.63921587     -1.32308715     -2.52432074
H       2.27003202     -1.96232777     -2.74188546
C       5.30195418      0.71893948      0.11785878
H       5.90168896     -0.03127722      0.64162614
H       5.68941464      0.79779348     -0.89903095
H       5.45235376      1.67364770      0.62379897
C       0.77752422      0.84443266      2.31252023
H       0.24290238      0.02264330      2.79447732
H       1.37311926      1.34997011      3.07190689
H       0.03186207      1.55423459      1.94264640
Br     -0.63398901     -1.03844560      0.19052128
Cl     -3.46883435     -2.22786424      0.32202301


    33
 structure 19
C      -1.84360616      0.18242714      1.26530277
C      -1.33099485     -0.43844092      0.11943664
C      -2.09873769     -0.68156660     -1.02696970
C      -3.43415618     -0.27836192     -0.99571450
C      -3.99356747      0.33813626      0.12277236
C      -3.18532660      0.56539315      1.23528689
H      -4.05210656     -0.45283550     -1.87184368
H      -3.60700591      1.05474682      2.10846169
C       1.27570841      2.97366737     -1.33875690
C       2.32443438      3.45724935     -0.56198963
C       2.91605698      2.64543675      0.40156958
C       2.46598743      1.34218155      0.59924956
C       1.42162108      0.88948857     -0.19228016
C       0.80960688      1.67337837     -1.15940388
H       0.81596105      3.60219146     -2.09283812
H       2.68192650      4.47011590     -0.70842227
H       3.73169976      3.02128629      1.00856639
H       2.92773014      0.69922063      1.33757642
H      -0.00815054      1.29658213     -1.76282594
C      -1.01406405      0.45747147      2.49024182
H      -0.60621507     -0.46478704      2.91178179
H      -0.16959217      1.11337917      2.25908912
H      -1.61738494      0.94282859      3.25724069
C      -5.44619509      0.72711576      0.13499934
H      -6.06618244     -0.12465730      0.43026213
H      -5.63531161      1.53506693      0.84335525
H      -5.77939006      1.04669579     -0.85396525
C      -1.54824477     -1.33974281     -2.26525531
H      -1.22467063     -2.36402842     -2.06378419
H      -2.30932918     -1.37464289     -3.04451912
H      -0.68347523     -0.79927924     -2.65826476
I       0.69133444     -1.06643746      0.11735210
Cl      3.59115516     -1.86845289      0.10056089


    33
 structure 20
C      -1.96737451      0.44077751      1.17713059
C      -1.47697279     -0.35103947      0.13143252
C      -2.28171510     -0.80195165     -0.92216384
C      -3.62809459     -0.43182772     -0.90313760
C      -4.16239155      0.35662701      0.11451816
C      -3.31989756      0.78466935      1.13875803
H      -4.27372592     -0.76800518     -1.70966920
H      -3.72227324      1.40417233      1.93510458
C       0.88557246      3.23727766     -1.37199168
C       1.98244092      3.78071890     -0.70966135
C       2.72427324      3.00361910      0.17517545
C       2.37646533      1.67472645      0.41111149
C       1.27942545      1.16794504     -0.26576465
C       0.51863250      1.91056215     -1.15441005
H       0.31019309      3.83911336     -2.06612469
H       2.26071822      4.81371847     -0.88473524
H       3.57836874      3.42616271      0.69204929
H       2.95409265      1.06141652      1.09164376
H      -0.33683897      1.48533318     -1.66711382
C      -1.10717456      0.94089859      2.30666707
H      -0.60056655      0.12088132      2.82171232
H      -0.33786878      1.63095521      1.94731566
H      -1.71454640      1.47234049      3.03935857
C      -5.62319826      0.71539960      0.12176103
H      -6.20151026     -0.04725990      0.65180998
H      -5.79532216      1.66790655      0.62555324
H      -6.02045104      0.78233136     -0.89243980
C      -1.76017136     -1.64534903     -2.05741129
H      -1.35514189     -2.59700025     -1.70330063
H      -2.56061526     -1.86904457     -2.76238460
H      -0.96370960     -1.13383768     -2.60511876
At      0.67064909     -0.90871076      0.12649549
Cl      3.59618276     -1.57335824      0.09306701


    33
 structure 21
C      -2.78709699      0.73902452     -0.78005169
C      -1.91266447      0.47188889      0.27036776
C      -2.11526024     -0.41728537      1.31888196
C      -3.31714815     -1.12390629      1.26504358
C      -4.24627178     -0.92982457      0.24369555
C      -3.96830065     -0.00008974     -0.75979753
H      -3.52829002     -1.83762760      2.05514152
H      -4.69044166      0.16321266     -1.55369114
C       1.96900703     -1.32529455     -1.36366636
C       2.93104690     -1.49799318     -0.38155765
C       2.86675189     -0.78411150      0.80603803
C       1.83647494      0.11404814      1.01519547
C       0.87823033      0.28096497      0.02804099
C       0.93862438     -0.42438189     -1.16075733
C      -2.52116176      1.75973684     -1.85106152
H      -2.46513792      2.76798883     -1.43272151
H      -1.58372329      1.56840870     -2.37674987
H      -3.32840295      1.74634431     -2.58226893
C      -5.54805250     -1.68074737      0.23728184
H      -6.34606672     -1.05478747      0.64693064
H      -5.83764645     -1.95806106     -0.77765635
H      -5.48962276     -2.58586335      0.84273189
C      -1.13437260     -0.63791207      2.43320900
H      -0.75618340      0.30324202      2.83778333
H      -1.61399435     -1.18160851      3.24610121
H      -0.28276341     -1.23540704      2.09505812
Cl     -0.38820126      1.46498075      0.26920770
Cl      2.08420845      3.19273793     -0.23257881
F       1.77087770      0.78660024      2.14621866
F       0.02662619     -0.24176685     -2.09967064
F       2.03891202     -2.01437607     -2.49168755
F       3.91477076     -2.35707309     -0.57450459
F       3.79007028     -0.96691310      1.73647494


    33
 structure 22
C       2.81663238     -0.43811241     -0.87461206
C       1.93240644     -0.39868524      0.20391010
C       2.10978734      0.33340041      1.37706624
C       3.26930886      1.10728371      1.43166432
C       4.19328809      1.13390160      0.38788478
C       3.95276294      0.35997808     -0.74723632
H       3.45041537      1.69985957      2.32337057
H       4.67065090      0.36641697     -1.56159261
C      -1.96827581      1.67196808     -1.23009606
C      -2.93180182      1.76512495     -0.23945143
C      -2.91635186      0.90082551      0.84501845
C      -1.93125475     -0.06513400      0.94318539
C      -0.97302220     -0.15953989     -0.05430532
C      -0.98547211      0.70209397     -1.13743260
C       2.61398832     -1.28822209     -2.09877954
H       2.60938926     -2.35267283     -1.84957897
H       1.67417495     -1.06125644     -2.60578272
H       3.42658938     -1.11806006     -2.80378293
C       5.45008851      1.94961762      0.50111584
H       6.24716550      1.35277309      0.95414890
H       5.79911673      2.27680032     -0.47930709
H       5.29780194      2.82826823      1.12916625
C       1.13590452      0.33949858      2.52053758
H       0.79822740     -0.66534792      2.78238761
H       1.60336921      0.77548526      3.40268995
H       0.25580600      0.94530162      2.28482581
Br      0.33788165     -1.52043310      0.04064853
Cl     -2.18814223     -3.10999519     -0.46823151
F      -1.91035325     -0.86955782      1.98783399
F      -3.83942872      1.01032666      1.78796882
F      -3.86770711      2.69336441     -0.32099780
F      -1.98804949      2.50698618     -2.25774103
F      -0.06869250      0.60927118     -2.08707775


    33
 structure 23
C      -1.76997360      0.23308394      1.17848716
C      -1.33733291     -0.43586775      0.02794707
C      -2.18690272     -0.75735860     -1.04161286
C      -3.51863737     -0.36493957     -0.92908127
C      -3.99919819      0.31462144      0.19129342
C      -3.11626554      0.60255162      1.22823416
H      -4.20128539     -0.59911128     -1.74093236
H      -3.47766974      1.12764231      2.10741192
C       1.59825830      2.94232165     -1.46105913
C       2.37047527      3.46593017     -0.43744282
C       2.65705700      2.70624540      0.68630302
C       2.17159874      1.41446550      0.78251265
C       1.40305219      0.88181631     -0.24178549
C       1.11657797      1.64882740     -1.35846104
C      -0.86542053      0.58976518      2.32664244
H      -0.22454526     -0.24208001      2.62715856
H      -0.22153499      1.43684050      2.07191918
H      -1.45567666      0.88310667      3.19463368
C      -5.44913012      0.70309863      0.27326898
H      -6.07754959     -0.18386301      0.39124862
H      -5.63796146      1.36446805      1.11940030
H      -5.77068917      1.20976506     -0.63929158
C      -1.73207382     -1.50437830     -2.26833551
H      -1.39527608     -2.51572677     -2.02382426
H      -2.55495223     -1.59621751     -2.97680314
H      -0.91020194     -0.99436948     -2.77586776
I       0.69511529     -1.05885910     -0.11349653
Cl      3.49936108     -1.56037971     -0.39999328
F       2.44030892      0.70871022      1.86941325
F       0.38277269      1.15734165     -2.34866183
F       3.38325562      3.22625639      1.66567461
F       2.83056927      4.70189531     -0.52843587
F       1.32768903      3.67769460     -2.53033744


    33
 structure 24
C      -1.96591341      0.40553682      1.21043804
C      -1.50825356     -0.32455990      0.10682467
C      -2.34731998     -0.75267525     -0.93019783
C      -3.69807280     -0.41470923     -0.83431575
C      -4.20307870      0.31632543      0.23977007
C      -3.32631734      0.71775568      1.24515067
H      -4.37208407     -0.73452639     -1.62368423
H      -3.70724871      1.28970740      2.08639784
C       1.35294383      3.11372140     -1.72886176
C       2.11777484      3.75723753     -0.77040146
C       2.46069729      3.10827010      0.40524941
C       2.03539283      1.80876564      0.61893707
C       1.27296701      1.15721129     -0.33696837
C       0.93389976      1.81290965     -1.50710968
C      -1.07463909      0.88195302      2.32588588
H      -0.43661846      0.08481375      2.71412903
H      -0.42595518      1.69686238      1.99078254
H      -1.67451961      1.26281042      3.15228237
C      -5.66988567      0.63472948      0.32901798
H      -6.20217808     -0.16756258      0.84870665
H      -5.84251625      1.55790881      0.88438170
H      -6.11486283      0.73676723     -0.66207820
C      -1.86742967     -1.55213280     -2.11403933
H      -1.46693423     -2.52346789     -1.81087117
H      -2.69209578     -1.73859542     -2.80159906
H      -1.08399758     -1.02728455     -2.66588023
At      0.64228989     -0.88375722     -0.01101546
Cl      3.55858251     -1.28874640     -0.28832435
F       2.35957285      1.21215225      1.75741813
F       3.18521897      3.73870822      1.31983607
F       2.52047859      5.00033507     -0.97698758
F       1.02997270      3.74320727     -2.85096669
F       0.20687777      1.20981598     -2.44106234


    12
 structure 25
C       0.00000093      1.20485171     -1.56695263
C       0.00000126      1.21374943     -0.17499712
C       0.00000000      0.00000000      0.49973606
C      -0.00000126     -1.21374943     -0.17499712
C      -0.00000093     -1.20485171     -1.56695263
C      -0.00000000     -0.00000000     -2.26395996
H       0.00000176      2.14649611     -2.10428479
H       0.00000206      2.14672192      0.37585739
H      -0.00000206     -2.14672192      0.37585739
H      -0.00000176     -2.14649611     -2.10428479
H      -0.00000000     -0.00000000     -3.34800284
Cl      0.00000000      0.00000000      2.25256459


    12
 structure 26
C       0.00000109      1.20467836     -2.17204301
C       0.00000107      1.21416299     -0.77969453
C      -0.00000000      0.00000000     -0.10464309
C      -0.00000107     -1.21416299     -0.77969453
C      -0.00000109     -1.20467836     -2.17204301
C      -0.00000000      0.00000000     -2.86912722
H       0.00000192      2.14673528     -2.70873130
H       0.00000191      2.15012665     -0.23419282
H      -0.00000191     -2.15012665     -0.23419282
H      -0.00000192     -2.14673528     -2.70873130
H      -0.00000000      0.00000000     -3.95319333
Br      0.00000000     -0.00000000      1.80292897


    12
 structure 27
C       0.00000108      1.20443103     -2.62798156
C       0.00000109      1.21287759     -1.23522176
C       0.00000000     -0.00000000     -0.55378398
C      -0.00000109     -1.21287759     -1.23522176
C      -0.00000108     -1.20443103     -2.62798156
C       0.00000000     -0.00000000     -3.32537040
H       0.00000192      2.14674032     -3.16452644
H       0.00000191      2.15215018     -0.69533133
H      -0.00000191     -2.15215018     -0.69533133
H      -0.00000192     -2.14674032     -3.16452644
H       0.00000000     -0.00000000     -4.40952172
I      -0.00000000      0.00000000      1.54269063


    12
 structure 28
C       0.00000122      1.20477655     -3.08022468
C       0.00000090      1.21324955     -1.68674979
C      -0.00000000     -0.00000000     -1.00713436
C      -0.00000090     -1.21324955     -1.68674979
C      -0.00000122     -1.20477655     -3.08022468
C      -0.00000000     -0.00000000     -3.77700798
H       0.00000206      2.14665176     -3.61780268
H       0.00000181      2.15279091     -1.14702788
H      -0.00000181     -2.15279091     -1.14702788
H      -0.00000206     -2.14665176     -3.61780268
H      -0.00000000     -0.00000000     -4.86127460
At      0.00000000      0.00000000      1.17999392


    21
 structure 29
C      -1.34222234     -1.19838994     -0.00128014
C       0.05445403     -1.22977761     -0.00788079
C       0.71999387     -0.00433126     -0.00284240
C       0.05506563      1.22485590      0.00843647
C      -1.33849447      1.19550157      0.01475857
C      -2.05452858     -0.00205912      0.00828696
H      -1.88115189     -2.14158328     -0.00388871
H      -1.87727053      2.13931477      0.02481433
Cl      2.47805338     -0.00502414     -0.00843050
C       0.79476191     -2.53773489     -0.01749564
H       1.43570617     -2.62481468     -0.89854437
H       1.44010694     -2.63520282      0.85925676
H       0.09317626     -3.37208389     -0.02078579
C      -3.55986355      0.00960923     -0.00427738
H      -3.93787937      0.35259811     -0.97161876
H      -3.96569702     -0.98653696      0.17814860
H      -3.95707221      0.68487451      0.75702348
C       0.79949015      2.53047425      0.01637115
H       1.44454038      2.61461419      0.89471953
H       1.44132826      2.62681634     -0.86303286
H       0.10039197      3.36687973      0.02347448


    21
 structure 30
C       1.81185305     -1.19628594     -0.00981474
C       0.41611190     -1.22837268     -0.00302203
C      -0.24989539      0.00000014      0.00081882
C       0.41611135      1.22837299     -0.00302230
C       1.81185278      1.19628681     -0.00981444
C       2.52616051      0.00000065     -0.01022705
H       2.35093516     -2.13964282     -0.01608030
H       2.35093441      2.13964392     -0.01608006
Br     -2.16590620     -0.00000029      0.00406412
C      -0.31121656     -2.54400667     -0.00451511
H      -0.95154558     -2.64559407      0.87530504
H      -0.95439180     -2.64234593     -0.88269775
H       0.39955594     -3.37051607     -0.00713599
C      -0.31121749      2.54400678     -0.00451514
H      -0.95439330      2.64234551     -0.88269742
H      -0.95154601      2.64559432      0.87530536
H       0.39955474      3.37051640     -0.00713668
C       4.03109859     -0.00000017      0.01560210
H       4.39952742     -0.00002441      1.04572624
H       4.43646662     -0.88503469     -0.47786694
H       4.43646714      0.88505666     -0.47782631


    21
 structure 31
C       2.22997199      1.19537424     -0.00986171
C       0.83369969      1.22715758     -0.00393481
C       0.15997670      0.00000035     -0.00072479
C       0.83370059     -1.22715693     -0.00393891
C       2.22997237     -1.19537269     -0.00985727
C       2.94483642      0.00000115     -0.00979566
H       2.76947683      2.13853222     -0.01558023
H       2.76947800     -2.13853029     -0.01557483
I      -1.94752334     -0.00000034      0.00301976
C       0.12133014      2.55168033     -0.00538692
H      -0.51941135      2.65863492     -0.88450437
H      -0.51848280      2.66061437      0.87412136
H       0.84082276      3.37073538     -0.00660645
C       0.12133160     -2.55167999     -0.00538835
H      -0.51854633     -2.66057202      0.87407896
H      -0.51934485     -2.65867707     -0.88454691
H       0.84082464     -3.37073481     -0.00651499
C       4.44957926     -0.00000050      0.01709383
H       4.81691784     -0.00004794      1.04765277
H       4.85530397     -0.88515714     -0.47594217
H       4.85530533      0.88519943     -0.47586297


    21
 Structure 32
C      -2.69684018      1.19858637     -0.00051534
C      -1.29807343      1.22818926     -0.00806088
C      -0.62761947      0.00216664     -0.00266669
C      -1.30234651     -1.22502112      0.00957389
C      -2.69778824     -1.19185439      0.01665105
C      -3.41220395      0.00537300      0.00986971
H      -3.23472588      2.14252553     -0.00322609
H      -3.23928633     -2.13426264      0.02745862
At      1.57229029     -0.00093139     -0.01086505
C      -0.59275450     -2.55156293      0.01822193
H       0.04550616     -2.66686947     -0.86154529
H       0.04806224     -2.65410313      0.89776368
H      -1.31415786     -3.36905128      0.02523070
C      -4.91737521     -0.00324743     -0.00244288
H      -5.29565178     -0.34128898     -0.97144185
H      -5.31570474     -0.68153811      0.75555691
H      -5.32141330      0.99282483      0.18434451
C      -0.58745047      2.55418412     -0.01892634
H       0.05519757      2.66820060      0.85784826
H       0.04910250      2.65694833     -0.90150750
H      -1.30799701      3.37244217     -0.02177037


    12
 structure 33
C       0.00000099      1.19827249     -0.98113837
C       0.00000098      1.19406277      0.40289015
C      -0.00000000      0.00000000      1.11077960
C      -0.00000098     -1.19406277      0.40289015
C      -0.00000099     -1.19827249     -0.98113837
C       0.00000000     -0.00000000     -1.67455095
Cl     -0.00000000      0.00000000      2.82899073
F       0.00000194      2.35504514      1.04503817
F       0.00000194      2.34839886     -1.64350899
F       0.00000000     -0.00000000     -2.99986233
F      -0.00000194     -2.34839886     -1.64350899
F      -0.00000194     -2.35504514      1.04503817


    12
 structure 34
C       0.00000107      1.19820956     -1.46588618
C       0.00000106      1.19396709     -0.08153761
C      -0.00000000     -0.00000000      0.62583100
C      -0.00000106     -1.19396709     -0.08153761
C      -0.00000107     -1.19820956     -1.46588618
C       0.00000000      0.00000000     -2.15934007
Br     -0.00000000     -0.00000000      2.49914787
F       0.00000210      2.35778532      0.55487530
F       0.00000209      2.34786276     -2.12941487
F       0.00000000      0.00000000     -3.48425815
F      -0.00000209     -2.34786276     -2.12941487
F      -0.00000210     -2.35778532      0.55487530


    12
 structure 35
C       0.00000106      1.19818531     -1.87985248
C       0.00000105      1.19092225     -0.49540484
C      -0.00000000     -0.00000000      0.21605295
C      -0.00000105     -1.19092225     -0.49540484
C      -0.00000106     -1.19818531     -1.87985248
C       0.00000000      0.00000000     -2.57351713
I      -0.00000000     -0.00000000      2.28436376
F       0.00000209      2.35981297      0.13706625
F       0.00000208      2.34788512     -2.54459588
F       0.00000000      0.00000000     -3.89865258
F      -0.00000208     -2.34788512     -2.54459588
F      -0.00000209     -2.35981297      0.13706625


    12
 structure 36
C       0.00000102      1.19793859     -2.36835217
C       0.00000101      1.18868927     -0.98346555
C       0.00000000     -0.00000000     -0.27203272
C      -0.00000101     -1.18868927     -0.98346555
C      -0.00000102     -1.19793859     -2.36835217
C       0.00000000     -0.00000000     -3.06223374
At     -0.00000000      0.00000000      1.89034814
F       0.00000201      2.36060805     -0.35229497
F       0.00000200      2.34804993     -3.03422099
F       0.00000000     -0.00000000     -4.38832150
F      -0.00000200     -2.34804993     -3.03422099
F      -0.00000201     -2.36060805     -0.35229497


    16
 structure 37
C       0.67761784      1.83002492     -0.00000772
H       1.39070226      2.63761218     -0.00006145
C       0.00009652     -0.25380449      0.00000516
C      -0.67940770      1.82938422      0.00000911
H      -1.39323134      2.63631878      0.00003694
N       1.08744747      0.51464699     -0.00001333
N      -1.08800420      0.51362703      0.00005975
C       2.47191210      0.04154178      0.00000157
H       2.65650792     -0.55034182      0.89477161
H       2.65616499     -0.55139623     -0.89414292
H       3.11542705      0.91703501     -0.00067501
C      -2.47208645      0.03939715     -0.00002747
H      -3.11631166      0.91437507      0.00102208
H      -2.65637141     -0.55225563     -0.89503338
H      -2.65576258     -0.55409855      0.89386698
Cl      0.00105753     -1.94202521      0.00000038


    16
 structure 38
C      -2.29378032      0.67867603      0.00000885
H      -3.10138897      1.39183351     -0.00004919
C      -0.20729274      0.00000508     -0.00008231
C      -2.29378617     -0.67867263      0.00005268
H      -3.10136690     -1.39186134      0.00009470
N      -0.97901931      1.08729450     -0.00009954
N      -0.97902540     -1.08729669     -0.00000206
C      -0.51298392      2.47398985      0.00004548
H       0.07722168      2.66214041      0.89527181
H       0.07836173      2.66196267     -0.89444500
H      -1.39141552      3.11355427     -0.00060318
C      -0.51298162     -2.47399264     -0.00000465
H      -1.39140534     -3.11356748      0.00116217
H       0.07687442     -2.66235551     -0.89540672
H       0.07874943     -2.66176185      0.89428660
Br      1.63730375      0.00000104      0.00000799


    16
 structure 39
C      -2.67906857      0.67887872     -0.00006572
H      -3.48705102      1.39169034     -0.00015718
C      -0.58441687      0.00000031      0.00005404
C      -2.67911490     -0.67877526      0.00004032
H      -3.48711731     -1.39156264      0.00003853
N      -1.36471847      1.08512309     -0.00009536
N      -1.36476494     -1.08509452      0.00013323
C      -0.90592434      2.47371971      0.00005108
H      -0.31652729      2.66514966      0.89544830
H      -0.31463200      2.66470838     -0.89418337
H      -1.78586152      3.11135260     -0.00108779
C      -0.90603414     -2.47374274     -0.00004818
H      -1.78599140     -3.11134850      0.00087377
H      -0.31651476     -2.66515411     -0.89537229
H      -0.31486207     -2.66482204      0.89424377
I       1.46117536     -0.00001317     -0.00000487


    16
 structure 40
C      -3.08415126      0.67855160      0.00007660
H      -3.89199163      1.39150128      0.00008560
C      -0.98497902      0.00000801     -0.00007841
C      -3.08417205     -0.67848283      0.00004277
H      -3.89204330     -1.39139879      0.00005333
N      -1.76821917      1.08338162     -0.00001897
N      -1.76825798     -1.08336111      0.00000132
C      -1.31021546      2.47191417     -0.00005473
H      -0.71762257      2.66207358      0.89345728
H      -0.71756550      2.66201611     -0.89353593
H      -2.18940222      3.11078725     -0.00008327
C      -1.31030255     -2.47192176     -0.00005293
H      -2.18953650     -3.11073077      0.00010452
H      -0.71782798     -2.66209978     -0.89363289
H      -0.71756003     -2.66208333      0.89336040
At      1.15802132     -0.00000734      0.00000841


    13
 structure 41
C       2.96067164      1.18806695     -0.06142550
C       1.57021100      1.20713383     -0.00028592
C       0.88209804      0.00046433      0.04437364
C       1.55218153     -1.21707810      0.03143107
C       2.94272902     -1.22038318     -0.02993131
C       3.64926313     -0.02176773     -0.07673676
H       3.50350785      2.12600011     -0.09833903
H       1.02723642      2.14493795      0.01036403
H       0.99518061     -2.14602471      0.06681696
H       3.47146484     -2.16698249     -0.04191876
H       4.73222172     -0.03049538     -0.12579642
Cl     -0.86463089      0.01409440      0.10969496
Cl     -4.70667127      0.02062500     -0.09146600


    13
 structure 42
C       3.13587152      1.20388531      0.00013279
C       1.74347123      1.21114092     -0.00007215
C       1.05913503     -0.00001108     -0.00016113
C       1.74348184     -1.21120466     -0.00007206
C       3.13586384     -1.20393872      0.00013179
C       3.83471673     -0.00001607      0.00024957
H       3.67191271      2.14662767      0.00023861
H       1.19927265      2.14827724     -0.00015828
H       1.19926546     -2.14832696     -0.00015793
H       3.67192996     -2.14666607      0.00024106
H       4.91893858     -0.00000504      0.00046073
Br     -0.84671316      0.00005389     -0.00016501
Cl     -4.29068236     -0.00005453      0.00022931


    13
 structure 43
C      -3.38579993      1.20336519     -0.03869542
C      -1.99332871      1.20820587     -0.00081651
C      -1.29851616      0.00004366      0.01672615
C      -1.99318800     -1.20816366     -0.00080233
C      -3.38564454     -1.20347856     -0.03868390
C      -4.08522321     -0.00009984     -0.05852227
H      -3.92167032      2.14640022     -0.05447409
H      -1.45580455      2.14957043      0.01193932
H      -1.45553145     -2.14945821      0.01196261
H      -3.92139652     -2.14657741     -0.05446975
H      -5.16913815     -0.00019338     -0.09037967
I       0.80476310      0.00003601      0.04244184
Cl      4.12478235     -0.00005213     -0.07936648


    13
 structure 44
C      -3.64353774      1.20517975      0.00302305
C      -2.24966590      1.22141472      0.00123390
C      -1.54275872      0.02033036      0.00406128
C      -2.22920575     -1.19282832      0.00889882
C      -3.62280412     -1.20147360      0.01060853
C      -4.33308175     -0.00416719      0.00755869
H      -4.18843836      2.14335615      0.00058508
H      -1.72310489      2.16948924     -0.00261538
H      -1.68553099     -2.13124991      0.01125293
H      -4.15074606     -2.14930318      0.01424114
H      -5.41754983     -0.01364108      0.00866020
At      0.65985592      0.02534278     -0.00187833
Cl      3.90656685     -0.08555972     -0.02263590


    22
 structure 45
C      -2.33748449     -1.22458589     -0.01218097
C      -0.94420565     -1.21315422      0.01663031
C      -0.30915191      0.03353668      0.02800305
C      -1.01437292      1.23750189      0.01385058
C      -2.40983167      1.16733934     -0.01440843
C      -3.08803932     -0.04818414     -0.02795670
H      -2.84971099     -2.18329813     -0.02275294
H      -2.97546865      2.09483278     -0.02633471
Cl      1.44351158      0.08175135      0.05661845
Cl      5.14850561     -0.03894431     -0.05428132
C      -0.16328307     -2.49737753      0.03302693
H       0.50003922     -2.57084311     -0.83259119
H       0.46783873     -2.56812386      0.92257226
H      -0.83797004     -3.35396883      0.02208664
C      -4.59258833     -0.10588006     -0.06011367
H      -4.94602066     -0.63648735     -0.94820380
H      -4.98424836     -0.63680094      0.81153817
H      -5.02786100      0.89456604     -0.06973703
C      -0.31276893      2.56685379      0.02592416
H       0.31515486      2.67691159      0.91362546
H       0.34227795      2.67813358     -0.84191007
H      -1.03796554      3.38105934      0.01532449


    22
 structure 46
C       2.64020089     -1.19344488      0.00141201
C       1.24532112     -1.22449351      0.00577513
C       0.56906063      0.00142542     -0.00045013
C       1.24252564      1.22650281     -0.01114060
C       2.63957021      1.19761007     -0.01478296
C       3.35524353      0.00340309     -0.00647398
H       3.18067608     -2.13647788      0.00399581
H       3.17766040      2.14157543     -0.02603251
Br     -1.34377468     -0.00038268     -0.00022769
Cl     -4.85800139     -0.00079356     -0.00107060
C       0.51956930     -2.54143390      0.01342106
H      -0.12383868     -2.63641107      0.89170673
H      -0.12375456     -2.64662510     -0.86378159
H       1.23064045     -3.36813033      0.01844953
C       0.51616292      2.54309368     -0.02223048
H      -0.12651148      2.63625762     -0.90129094
H      -0.12796076      2.64957288      0.85421283
H       1.22675637      3.37020225     -0.02800800
C       4.86074314     -0.00224438      0.01618615
H       5.23378896     -0.19835284      1.02581409
H       5.26456538     -0.77940808     -0.63622175
H       5.26588221      0.95866594     -0.30542911


    22
 structure 47
C      -2.90943639     -1.19437767      0.01272447
C      -1.51303581     -1.22251297     -0.01713984
C      -0.82605207     -0.00000127     -0.02839108
C      -1.51303660      1.22251616     -0.01715787
C      -2.90943330      1.19438353      0.01273085
C      -3.62557920      0.00000120      0.03312586
H      -3.44908303     -2.13784793      0.02076721
H      -3.44907837      2.13785484      0.02077677
I       1.28606203     -0.00001044     -0.04192891
Cl      4.65815749      0.00001957      0.10845460
C      -0.80309314     -2.54933870     -0.03592443
H      -0.17256077     -2.65215608     -0.92282154
H      -0.14949184     -2.66380080      0.83274039
H      -1.52296304     -3.36867960     -0.03169114
C      -0.80308849      2.54933916     -0.03592596
H      -0.14938732      2.66373349      0.83267343
H      -0.17266093      2.65222243     -0.92288831
H      -1.52295350      3.36868458     -0.03154635
C      -5.12948972      0.00001453      0.10623410
H      -5.46642294      0.00031560      1.14734814
H      -5.55095139      0.88489494     -0.37450987
H      -5.55094345     -0.88514452     -0.37400140


    22
 structure 48
C      -3.21049012      1.19656746     -0.02099394
C      -1.81138137      1.22244783      0.00779135
C      -1.12451090      0.00252229      0.01911015
C      -1.81453056     -1.21975063      0.00787009
C      -3.20982926     -1.19188361     -0.02089502
C      -3.92663017      0.00409766     -0.03682788
H      -3.74898742      2.14054262     -0.03286231
H      -3.75132621     -2.13484231     -0.03263787
At      1.08879418      0.00055254      0.02481166
Cl      4.37528678     -0.00450276     -0.09227053
C      -1.10633923     -2.54847578      0.02126637
H      -0.45691838     -2.66261640     -0.85065034
H      -0.47283936     -2.65338194      0.90586589
H      -1.82689420     -3.36745011      0.01888848
C      -5.43232662     -0.00735231     -0.06575618
H      -5.80608986     -0.60580592     -0.90052055
H      -5.83993858     -0.44119965      0.85159632
H      -5.83493409      1.00190362     -0.16674365
C      -1.10390712      2.55163138      0.02081064
H      -0.47018526      2.65708820      0.90520488
H      -0.45486704      2.66613120     -0.85136982
H      -1.82472763      3.37038589      0.01858336


    13
 structure 49
C      -1.84724579     -1.22156725      0.00036494
C      -0.46424379     -1.17025096     -0.00191770
C       0.20998106      0.04394895     -0.00235944
C      -0.54202567      1.21118511     -0.00053195
C      -1.92560215      1.17113845      0.00173491
C      -2.58047625     -0.04799416      0.00216522
Cl      1.92878495      0.09414170     -0.00486484
Cl      5.21946853     -0.04124548     -0.00659472
F       0.21178456     -2.31313219     -0.00365067
F      -2.47288743     -2.39412714      0.00073345
F      -3.90719135     -0.09155631      0.00433874
F      -2.62711465      2.29996458      0.00354785
F       0.05764730      2.39622270     -0.00084377


    13
 structure 50
C      -0.01980270     -0.11339508      0.42207537
C       1.31973071     -0.45386620      0.30670673
C       2.31307502      0.51507249      0.22428897
C       1.91742416      1.84698206      0.26499748
C       0.58265268      2.20553302      0.38001862
C      -0.39098977      1.22177508      0.45974668
Br      4.11569695      0.04400456      0.06083014
Cl      7.18391512     -0.75833494     -0.22457055
F       1.63645031     -1.74938531      0.27325020
F       2.82463790      2.82257236      0.19454850
F      -0.95325931     -1.06356185      0.49418591
F      -1.67476667      1.55729245      0.57187722
F       0.23037781      3.49153001      0.41755247


    13
 structure 51
C      -2.50258406      1.19606808      0.00880190
C      -1.11817795      1.18265408     -0.01732610
C      -0.39463790     -0.00007801     -0.02918110
C      -1.11836496     -1.18269010     -0.01731810
C      -2.50277607     -1.19588110      0.00880890
C      -3.19831612      0.00014799      0.02268190
I       1.71044325     -0.00017902     -0.02804110
Cl      4.76619249      0.00026097      0.07415991
F      -0.49285491      2.36164817     -0.02692210
F      -3.16933711      2.34863518      0.02231390
F      -4.52704622      0.00025900      0.04992090
F      -3.16971312     -2.34834219      0.02233190
F      -0.49322892     -2.36178619     -0.02690510


    13
 structure 52
C      -3.61373610      1.19717053      0.00353738
C      -2.22866293      1.17985472      0.00429078
C      -1.50465201      0.00037059      0.00729407
C      -2.22959246     -1.17854111      0.01017701
C      -3.61466932     -1.19481103      0.00937023
C      -4.30998792      0.00144630      0.00585585
At      0.71488236     -0.00084724     -0.00052800
Cl      3.71474169     -0.00563759     -0.02806407
F      -1.60296927      2.36227355      0.00140313
F      -4.28209972      2.35032461      0.00027618
F      -5.64013183      0.00195500      0.00471663
F      -4.28389047     -2.34746641      0.01156800
F      -1.60482502     -2.36145883      0.01329215


    17
 structure 53
C      -2.83159829     -0.67745475     -0.05135262
H      -3.63855835     -1.39051097     -0.07964412
C      -0.74268491     -0.00008901      0.02570884
C      -2.83100813      0.67906135     -0.05128649
H      -3.63736247      1.39280238     -0.07956400
N      -1.51575613     -1.08572522     -0.00331240
N      -1.51482457      1.08620406     -0.00324490
C      -1.03754176     -2.46739353      0.01351104
H      -0.40313900     -2.64575180     -0.85303103
H      -0.48157917     -2.65196975      0.93114749
H      -1.90802533     -3.11659781     -0.02701785
C      -1.03541342      2.46745498      0.01352977
H      -1.90553540      3.11743312     -0.02237603
H      -0.47545925      2.65020861      0.92908555
H      -0.40450970      2.64662090     -0.85540960
Cl      0.94692752     -0.00075399      0.06885625
Cl      4.04940851     -0.00013195     -0.04520640


    17
 structure 54
C      -3.07857940     -0.67812006      0.00032868
H      -3.88625605     -1.39101707      0.00057578
C      -0.98291791      0.00002347     -0.00041530
C      -3.07846498      0.67845421      0.00018547
H      -3.88597292      1.39154001      0.00031113
N      -1.76202041     -1.08447934      0.00003116
N      -1.76186294      1.08468096      0.00013736
C      -1.29307564     -2.46887317      0.00008977
H      -0.69842335     -2.65552257     -0.89252787
H      -0.69966458     -2.65587815      0.89347798
H      -2.16837486     -3.11306589     -0.00063073
C      -1.29270884      2.46900563      0.00009949
H      -2.16792840      3.11333259     -0.00033862
H      -0.69903841      2.65594291      0.89332179
H      -0.69833808      2.65560967     -0.89270776
Br      0.87436454     -0.00021051     -0.00029769
Cl      3.96017069      0.00012202      0.00035465


    17
 structure 55
C      -3.33020289      0.67827507     -0.00022659
H      -4.13821398      1.39094040     -0.00031856
C      -1.21870945      0.00009588      0.00010062
C      -3.33022279     -0.67803190     -0.00026967
H      -4.13829353     -1.39063033     -0.00039404
N      -2.01233691      1.07981602     -0.00023569
N      -2.01237390     -1.07962003     -0.00021789
C      -1.55173625      2.46582063     -0.00040915
H      -0.95717593      2.65724555      0.89164987
H      -0.95723507      2.65708622     -0.89254585
H      -2.42790769      3.10936021     -0.00044286
C      -1.55194656     -2.46567205     -0.00036746
H      -2.42821060     -3.10908774     -0.00026936
H      -0.95756431     -2.65705573     -0.89255908
H      -0.95730835     -2.65712471      0.89163442
I       0.88255550     -0.00016321      0.00020622
Cl      3.77978536      0.00021285      0.00014848


    17
 structure 56
C       3.59564605      0.67746753      0.00042628
H       4.40385360      1.38995965      0.00060541
C       1.47856519     -0.00011184     -0.00007020
C       3.59529699     -0.67872137      0.00063817
H       4.40315832     -1.39160602      0.00099276
N       2.27671029      1.07723353      0.00002944
N       2.27618074     -1.07784939      0.00004609
C       1.81630400      2.46280064      0.00002147
H       1.22025457      2.65303678     -0.89127472
H       1.22069669      2.65315058      0.89159211
H       2.69107507      3.10851989     -0.00024129
C       1.81520574     -2.46322812     -0.00004294
H       2.68972188     -3.10929840      0.00017099
H       1.21910139     -2.65323582      0.89126870
H       1.21948559     -2.65331931     -0.89159239
At     -0.74057140      0.00034202     -0.00023929
Cl     -3.63500722     -0.00065933      0.00073250


     2
 structure 57
Cl      0.00000000      0.00000000      1.01083474
Cl      0.00000000      0.00000000     -1.01083474


     2
 structure 58
Cl      0.00000000      0.00000000     -1.45415911
Br      0.00000000      0.00000000      0.70630606


     2
 structure 59
Cl      0.00000000      0.00000000     -1.76552113
I       0.00000000      0.00000000      0.56629904


     2
 structure 60
Cl      0.00000000      0.00000000     -2.02138939
At      0.00000000      0.00000000      0.40427788
